# Supplementary material for: Randomised double-blind phase 3 clinical study testing impact of atorvastatin on prostate cancer progression after initiation of androgen deprivation therapy: study protocol
Source: PubMed Central journal article supplement (PMC9058683; doi:10.1136/bmjopen-2021-050264), 2022-04-29
Supplement: bmjopen-2021-050264.draft_revisions.pdf [file bmjopen-2021-050264.draft_revisions.pdf]

# BMJ Open

BMJ Open is committed to open peer review. As part of this commitment we make the peer review history of every article we publish publicly available.

When an article is published we post the peer reviewers' comments and the authors' responses online. We also post the versions of the paper that were used during peer review. These are the versions that the peer review comments apply to.

The versions of the paper that follow are the versions that were submitted during the peer review process. They are not the versions of record or the final published versions. They should not be cited or distributed as the published version of this manuscript.

BMJ Open is an open access journal and the full, final, typeset and author-corrected version of record of the manuscript is available on our site with no access controls, subscription charges or pay-per-view fees (<http://bmjopen.bmj.com>).

If you have any questions on BMJ Open's open peer review process please email [info.bmjopen@bmj.com](mailto:info.bmjopen@bmj.com)

# BMJ Open

## Randomized double-blind phase 3 clinical study testing impact of atorvastatin on prostate cancer progression after initiation of androgen deprivation therapy - study protocol

|                               |                                                                                                                                                                                                                                                                                                                                                                                                                                                                                                                                                                                                                                                                                                                                                                                                                                                                                                                                                                                                                                                                                                                                                                                                                                                            |
|-------------------------------|------------------------------------------------------------------------------------------------------------------------------------------------------------------------------------------------------------------------------------------------------------------------------------------------------------------------------------------------------------------------------------------------------------------------------------------------------------------------------------------------------------------------------------------------------------------------------------------------------------------------------------------------------------------------------------------------------------------------------------------------------------------------------------------------------------------------------------------------------------------------------------------------------------------------------------------------------------------------------------------------------------------------------------------------------------------------------------------------------------------------------------------------------------------------------------------------------------------------------------------------------------|
| Journal:                      | <i>BMJ Open</i>                                                                                                                                                                                                                                                                                                                                                                                                                                                                                                                                                                                                                                                                                                                                                                                                                                                                                                                                                                                                                                                                                                                                                                                                                                            |
| Manuscript ID                 | bmjopen-2021-050264                                                                                                                                                                                                                                                                                                                                                                                                                                                                                                                                                                                                                                                                                                                                                                                                                                                                                                                                                                                                                                                                                                                                                                                                                                        |
| Article Type:                 | Protocol                                                                                                                                                                                                                                                                                                                                                                                                                                                                                                                                                                                                                                                                                                                                                                                                                                                                                                                                                                                                                                                                                                                                                                                                                                                   |
| Date Submitted by the Author: | 16-Feb-2021                                                                                                                                                                                                                                                                                                                                                                                                                                                                                                                                                                                                                                                                                                                                                                                                                                                                                                                                                                                                                                                                                                                                                                                                                                                |
| Complete List of Authors:     | Siltari, Aino; Tampere University, Faculty of Medicine and Health Technology; University of Helsinki, Faculty of Medicine, Pharmacology<br>Riikonen, Jarno; Tampere University Hospital, Department of Urology<br>Koskimäki, Juha; Tampere University Hospital, Department of Urology<br>Pakarainen, Tomi; Tampere University Hospital, Department of Urology<br>Ettala, Otto; University of Turku<br>Boström, Peter; University of Turku<br>Seikkula, Heikki; Central Finland Central Hospital<br>Kotsar, Andres; Tartu University Hospital<br>Tammela, Teuvo; University of Tampere<br>Helminen, Mika; Tampere University, Health Sciences<br>Lehtimäki, Terho; Tampere University, Department of Clinical Chemistry<br>Fode, Mikkel; Herlev Hospital<br>Østergren, Peter; Herlev and Gentofte University Hospital, Department of Urology<br>Borre, Michael; Aarhus Universitetshospital, Department of Urology<br>Rannikko, Antti; Helsinki University and Helsinki University Hospital, Department of Urology<br>Marttila, Timo; Seinäjoki Central Hospital, Department of Urology<br>Salonen, Arto; Kuopio University Hospital<br>Ronkainen, Hanna; Oulu University Hospital<br>Murtola, Teemu J ; Tampere University Hospital, Department of Urology |
| Keywords:                     | Prostate disease < UROLOGY, Clinical trials < THERAPEUTICS, Urological tumours < ONCOLOGY                                                                                                                                                                                                                                                                                                                                                                                                                                                                                                                                                                                                                                                                                                                                                                                                                                                                                                                                                                                                                                                                                                                                                                  |
|                               |                                                                                                                                                                                                                                                                                                                                                                                                                                                                                                                                                                                                                                                                                                                                                                                                                                                                                                                                                                                                                                                                                                                                                                                                                                                            |

SCHOLARONE™  
Manuscripts

# Randomized double-blind phase 3 clinical study testing impact of atorvastatin on prostate cancer progression after initiation of androgen deprivation therapy - study protocol

Aino Siltari<sup>1</sup>, Jarno Riikonen<sup>2</sup>, Juha Koskimäki<sup>2</sup>, Tomi Pakarainen<sup>2</sup>, Otto Ettala<sup>3</sup>, Peter Boström<sup>3</sup>, Heikki Seikkula<sup>4</sup>, Andres Kotsar<sup>5</sup>, Teuvo LJ Tammela<sup>1,2</sup>, Mika Helminen<sup>7,8</sup>, Terho Lehtimäki<sup>1,9</sup>, Mikkel Fode<sup>10</sup>, Peter Østergren<sup>10</sup>, Michael Borre<sup>11</sup>, Antti Rannikko<sup>12</sup>, Timo Marttila<sup>13</sup>, Arto Salonen<sup>14</sup>, Hanna Ronkainen<sup>15</sup>, Teemu J Murtola<sup>1,2\*</sup>

<sup>1</sup>Tampere University, Faculty of Medicine and Health Technology, Tampere, Finland, <sup>2</sup>TAYS Cancer Center, Department of Urology, Tampere, Finland, <sup>3</sup>Turku University Hospital and University of Turku, Turku, Finland, <sup>4</sup>Central Finland Central Hospital, Jyväskylä, Finland, <sup>5</sup>Tartu University Hospital, Department of Urology, Tartu, Estonia, <sup>6</sup>Fimlab laboratories, Department of Pathology, Tampere, Finland, <sup>7</sup>Tampere University Hospital, Research Services, Tampere, Finland, <sup>8</sup>Tampere University, Faculty of Social Sciences, Health Sciences, Tampere Finland, <sup>9</sup>Fimlab Laboratories, Department of Clinical Chemistry, Tampere, Finland, <sup>10</sup>Department of Urology, Herlev and Gentofte Hospital, Denmark, <sup>11</sup>Aarhus University Hospital, Department of Urology, Aarhus, Denmark, <sup>12</sup>Helsinki University and Helsinki University Hospital, Department of Urology, Helsinki, Finland <sup>13</sup>Seinäjoki Central Hospital, Department of Urology, Seinäjoki, Finland, <sup>14</sup>Kuopio University Hospital, Department of Urology, Kuopio, Finland, <sup>15</sup>Oulu University Hospital, Department of Urology, Oulu, Finland

\*corresponding author: Teemu J Murtola, Department of Urology, Tampere University Hospital, PL 2000, 33521 Tampere, Finland, teemu.murtola@tuni.fi, telephone: +358 (0) 294 52 11.

Keywords: Prostate cancer; castration-resistant prostate cancer; androgen deprivation therapy; atorvastatin; randomized clinical trial

Word count: 3604 (excluding title page, references, figures, and tables)

## Abstract

### Introduction

Blood cholesterol is likely a risk factor for prostate cancer prognosis and use of statins is associated with lowered risk of prostate cancer recurrence and progression. Furthermore, use of statins has been associated with prolonged time before development of castration resistance (CR) during androgen deprivation therapy (ADT) for prostate cancer. However, the efficacy of statins on delaying castration-resistance has not been tested in a randomized placebo-controlled setting.

This study aims to test statins' efficacy compared to placebo in delaying development of CR during ADT treatment for primary metastatic or recurrent prostate cancer in a randomized, placebo-controlled, double-blind clinical trial. Secondary aim is to explore effect of statin intervention on prostate cancer mortality and lipid metabolism during ADT.

### Methods and analysis

A total of 400 men with *de novo* metastatic prostate cancer or recurrent disease after primary treatment and starting ADT will be recruited and randomized 1:1 to use daily 80 mg of atorvastatin or placebo. Patients are followed until disease recurrence or death. Primary outcome is time to formation of CR after initiation of ADT. Serum lipid levels are analyzed to test whether changes in serum cholesterol parameters during ADT predict length of treatment response. Furthermore, the trial will compare quality of life, cardiovascular morbidity, changes in blood glucose and circulating cell-free DNA, and urine lipidome during trial.

### Ethics and dissemination

This study is approved by the Regional ethics committees of the Pirkanmaa Hospital District, Science center, Tampere, Finland (R18065M) and Tartu University Hospital, Tartu, Estonia (319/T-6). All participants read and sign informed consent form before study entry. Clinicaltrial.gov: NCT04026230, Eudra-CT: 2016-004774-17, protocol code: ESTO2, protocol date September 10<sup>th</sup> 2020 and version 6.

**Keywords:** Prostate cancer; castration-resistant prostate cancer; androgen deprivation therapy; atorvastatin; randomized clinical trial

### Strengths and limitations of this study

- First randomized placebo-controlled phase 3 clinical study on effects of atorvastatin on prostate cancer progression during ADT treatment.
- Clarifies the role of lipid metabolism in prostate cancer progression
- Investigates whether management of most severe cases of prostate cancer could be improved using cheap well-tolerated drug with established cardiovascular benefits
- Investigates the effects of atorvastatin treatment on glucose tolerance, mortality, and quality of life
- As a limiting factor, only minority of prostate cancer cases are advanced and large proportion of potential participants are ineligible due to using statins already. Thus, study enrolment will take several years

## Introduction

Prostate cancer (PCa) is the most common cancer in Finnish men and a major public health burden causing annually around 900 cancer deaths in Finland and the yearly costs caused by the disease are estimated to reach 180 million euros.<sup>1-2</sup> However, not all prostatic malignancies are lethal; only 10-20% of tumors advance to metastases and eventually into a fatal stage. Advanced PCa is treated by androgen deprivation therapy (ADT). Eventually, however, PCa progress despite the ADT treatment and forms state called castration resistance. Thus, castration resistance is clinically defined as a moment when prostate cancer no longer responds to ADT treatment. Median time to castration resistance is 12-15 months and 45 months to death in patients who have started ADT for metastatic prostate cancer.<sup>3-7</sup> In men who start ADT for disease recurrence after primary treatment, median failure-free survival time is 33 months and 70 months to death.<sup>3</sup>

Blood cholesterol is likely a risk factor for prostate cancer prognosis; risk of disease recurrence after primary treatment is significantly elevated in men with hypercholesterolemia.<sup>8</sup> Importance of cholesterol is also supported by studies demonstrating effects of cholesterol on prostate cancer cell growth.<sup>9,10</sup> Furthermore, upregulation of intracellular lipid production and ensuing lipid accumulation is essential in surviving hypoxic tumor microenvironment.<sup>11</sup> In prostate cancer cells it also assists in evading host-tumor immune response.<sup>12</sup> Also, upregulation of intracellular cholesterol production appears to be central for development of castration resistance.<sup>13</sup>

1  
2  
3 Lipid metabolism is emerging as a new risk factor for prostate cancer progression. The role of  
4 cholesterol is important in development of castration resistance, and inhibition of intracellular lipid  
5 production interferes with androgen receptor (AR) signaling essential for prostate cancer  
6 progression<sup>13-15</sup>. Cholesterol is precursor for intracellular androgen production, a central mechanism  
7 for prostate cancer cells to overcome ADT.<sup>13,15</sup> A recent study suggests that some of the serum basic  
8 lipid parameters may have increased association with development of castration resistance and  
9 metastasis especially in statin-naïve patients.<sup>16</sup> Clarification of the role of lipid metabolism during  
10 ADT will likely provide new tools for control of disease progression and prostate cancer treatment.  
11  
12

13  
14  
15  
16  
17  
18 Use of cholesterol-lowering statin drugs is associated with lowered risk of prostate cancer recurrence  
19 and progression; risk of prostate cancer death is reduced by 30% compared to the non-users.<sup>14,17,18</sup>  
20 The anticancer effect may be specifically against progression of the disease and the mechanisms  
21 driving it.<sup>19</sup> Statins inhibit the cholesterol-synthesizing mevalonate pathway, which is active in  
22 prostate cancer cells.<sup>10,20</sup> Besides cholesterol, this pathway produces also isoprenoid proteins which  
23 are critical for regulation of cell growth and other central cellular control processes.<sup>20</sup> Furthermore,  
24 steroid hormones such as testosterone are metabolized from cholesterol, thus statins appear to target  
25 androgen metabolism, another crucial pathway for prostate cancer growth.<sup>21,22</sup>  
26  
27  
28  
29  
30  
31

32  
33  
34  
35  
36  
37  
38  
39  
40  
41  
42  
43  
44  
45  
46  
47  
48  
49  
50  
51  
52  
53  
54  
55  
56  
57  
58  
59  
60  
61  
62  
63  
64  
65  
66  
67  
68  
69  
70  
71  
72  
73  
74  
75  
76  
77  
78  
79  
80  
81  
82  
83  
84  
85  
86  
87  
88  
89  
90  
91  
92  
93  
94  
95  
96  
97  
98  
99  
100  
101  
102  
103  
104  
105  
106  
107  
108  
109  
110  
111  
112  
113  
114  
115  
116  
117  
118  
119  
120  
121  
122  
123  
124  
125  
126  
127  
128  
129  
130  
131  
132  
133  
134  
135  
136  
137  
138  
139  
140  
141  
142  
143  
144  
145  
146  
147  
148  
149  
150  
151  
152  
153  
154  
155  
156  
157  
158  
159  
160  
161  
162  
163  
164  
165  
166  
167  
168  
169  
170  
171  
172  
173  
174  
175  
176  
177  
178  
179  
180  
181  
182  
183  
184  
185  
186  
187  
188  
189  
190  
191  
192  
193  
194  
195  
196  
197  
198  
199  
200  
201  
202  
203  
204  
205  
206  
207  
208  
209  
210  
211  
212  
213  
214  
215  
216  
217  
218  
219  
220  
221  
222  
223  
224  
225  
226  
227  
228  
229  
230  
231  
232  
233  
234  
235  
236  
237  
238  
239  
240  
241  
242  
243  
244  
245  
246  
247  
248  
249  
250  
251  
252  
253  
254  
255  
256  
257  
258  
259  
260  
261  
262  
263  
264  
265  
266  
267  
268  
269  
270  
271  
272  
273  
274  
275  
276  
277  
278  
279  
280  
281  
282  
283  
284  
285  
286  
287  
288  
289  
290  
291  
292  
293  
294  
295  
296  
297  
298  
299  
300  
301  
302  
303  
304  
305  
306  
307  
308  
309  
310  
311  
312  
313  
314  
315  
316  
317  
318  
319  
320  
321  
322  
323  
324  
325  
326  
327  
328  
329  
330  
331  
332  
333  
334  
335  
336  
337  
338  
339  
340  
341  
342  
343  
344  
345  
346  
347  
348  
349  
350  
351  
352  
353  
354  
355  
356  
357  
358  
359  
360  
361  
362  
363  
364  
365  
366  
367  
368  
369  
370  
371  
372  
373  
374  
375  
376  
377  
378  
379  
380  
381  
382  
383  
384  
385  
386  
387  
388  
389  
390  
391  
392  
393  
394  
395  
396  
397  
398  
399  
400  
401  
402  
403  
404  
405  
406  
407  
408  
409  
410  
411  
412  
413  
414  
415  
416  
417  
418  
419  
420  
421  
422  
423  
424  
425  
426  
427  
428  
429  
430  
431  
432  
433  
434  
435  
436  
437  
438  
439  
440  
441  
442  
443  
444  
445  
446  
447  
448  
449  
450  
451  
452  
453  
454  
455  
456  
457  
458  
459  
460  
461  
462  
463  
464  
465  
466  
467  
468  
469  
470  
471  
472  
473  
474  
475  
476  
477  
478  
479  
480  
481  
482  
483  
484  
485  
486  
487  
488  
489  
490  
491  
492  
493  
494  
495  
496  
497  
498  
499  
500  
501  
502  
503  
504  
505  
506  
507  
508  
509  
510  
511  
512  
513  
514  
515  
516  
517  
518  
519  
520  
521  
522  
523  
524  
525  
526  
527  
528  
529  
530  
531  
532  
533  
534  
535  
536  
537  
538  
539  
540  
541  
542  
543  
544  
545  
546  
547  
548  
549  
550  
551  
552  
553  
554  
555  
556  
557  
558  
559  
560  
561  
562  
563  
564  
565  
566  
567  
568  
569  
570  
571  
572  
573  
574  
575  
576  
577  
578  
579  
580  
581  
582  
583  
584  
585  
586  
587  
588  
589  
590  
591  
592  
593  
594  
595  
596  
597  
598  
599  
600  
601  
602  
603  
604  
605  
606  
607  
608  
609  
610  
611  
612  
613  
614  
615  
616  
617  
618  
619  
620  
621  
622  
623  
624  
625  
626  
627  
628  
629  
630  
631  
632  
633  
634  
635  
636  
637  
638  
639  
640  
641  
642  
643  
644  
645  
646  
647  
648  
649  
650  
651  
652  
653  
654  
655  
656  
657  
658  
659  
660  
661  
662  
663  
664  
665  
666  
667  
668  
669  
670  
671  
672  
673  
674  
675  
676  
677  
678  
679  
680  
681  
682  
683  
684  
685  
686  
687  
688  
689  
690  
691  
692  
693  
694  
695  
696  
697  
698  
699  
700  
701  
702  
703  
704  
705  
706  
707  
708  
709  
710  
711  
712  
713  
714  
715  
716  
717  
718  
719  
720  
721  
722  
723  
724  
725  
726  
727  
728  
729  
730  
731  
732  
733  
734  
735  
736  
737  
738  
739  
740  
741  
742  
743  
744  
745  
746  
747  
748  
749  
750  
751  
752  
753  
754  
755  
756  
757  
758  
759  
760  
761  
762  
763  
764  
765  
766  
767  
768  
769  
770  
771  
772  
773  
774  
775  
776  
777  
778  
779  
780  
781  
782  
783  
784  
785  
786  
787  
788  
789  
790  
791  
792  
793  
794  
795  
796  
797  
798  
799  
800  
801  
802  
803  
804  
805  
806  
807  
808  
809  
810  
811  
812  
813  
814  
815  
816  
817  
818  
819  
820  
821  
822  
823  
824  
825  
826  
827  
828  
829  
830  
831  
832  
833  
834  
835  
836  
837  
838  
839  
840  
841  
842  
843  
844  
845  
846  
847  
848  
849  
850  
851  
852  
853  
854  
855  
856  
857  
858  
859  
860  
861  
862  
863  
864  
865  
866  
867  
868  
869  
870  
871  
872  
873  
874  
875  
876  
877  
878  
879  
880  
881  
882  
883  
884  
885  
886  
887  
888  
889  
890  
891  
892  
893  
894  
895  
896  
897  
898  
899  
900  
901  
902  
903  
904  
905  
906  
907  
908  
909  
910  
911  
912  
913  
914  
915  
916  
917  
918  
919  
920  
921  
922  
923  
924  
925  
926  
927  
928  
929  
930  
931  
932  
933  
934  
935  
936  
937  
938  
939  
940  
941  
942  
943  
944  
945  
946  
947  
948  
949  
950  
951  
952  
953  
954  
955  
956  
957  
958  
959  
960  
961  
962  
963  
964  
965  
966  
967  
968  
969  
970  
971  
972  
973  
974  
975  
976  
977  
978  
979  
980  
981  
982  
983  
984  
985  
986  
987  
988  
989  
990  
991  
992  
993  
994  
995  
996  
997  
998  
999  
1000

Statin use has been reported to prolong efficacy of ADT in prostate cancer as it has been reported to  
prolong the efficacy of ADT for 8-10 months.<sup>23,24</sup> Furthermore, statins have been linked to a  
prolonged response to androgen-signaling targeted drugs abiraterone and enzalutamide used in  
management of castration-resistant disease.<sup>25,26</sup>

41  
42  
43  
44  
45  
46  
47  
48  
49  
50  
51  
52  
53  
54  
55  
56  
57  
58  
59  
60  
61  
62  
63  
64  
65  
66  
67  
68  
69  
70  
71  
72  
73  
74  
75  
76  
77  
78  
79  
80  
81  
82  
83  
84  
85  
86  
87  
88  
89  
90  
91  
92  
93  
94  
95  
96  
97  
98  
99  
100  
101  
102  
103  
104  
105  
106  
107  
108  
109  
110  
111  
112  
113  
114  
115  
116  
117  
118  
119  
120  
121  
122  
123  
124  
125  
126  
127  
128  
129  
130  
131  
132  
133  
134  
135  
136  
137  
138  
139  
140  
141  
142  
143  
144  
145  
146  
147  
148  
149  
150  
151  
152  
153  
154  
155  
156  
157  
158  
159  
160  
161  
162  
163  
164  
165  
166  
167  
168  
169  
170  
171  
172  
173  
174  
175  
176  
177  
178  
179  
180  
181  
182  
183  
184  
185  
186  
187  
188  
189  
190  
191  
192  
193  
194  
195  
196  
197  
198  
199  
200  
201  
202  
203  
204  
205  
206  
207  
208  
209  
210  
211  
212  
213  
214  
215  
216  
217  
218  
219  
220  
221  
222  
223  
224  
225  
226  
227  
228  
229  
230  
231  
232  
233  
234  
235  
236  
237  
238  
239  
240  
241  
242  
243  
244  
245  
246  
247  
248  
249  
250  
251  
252  
253  
254  
255  
256  
257  
258  
259  
260  
261  
262  
263  
264  
265  
266  
267  
268  
269  
270  
271  
272  
273  
274  
275  
276  
277  
278  
279  
280  
281  
282  
283  
284  
285  
286  
287  
288  
289  
290  
291  
292  
293  
294  
295  
296  
297  
298  
299  
300  
301  
302  
303  
304  
305  
306  
307  
308  
309  
310  
311  
312  
313  
314  
315  
316  
317  
318  
319  
320  
321  
322  
323  
324  
325  
326  
327  
328  
329  
330  
331  
332  
333  
334  
335  
336  
337  
338  
339  
340  
341  
342  
343  
344  
345  
346  
347  
348  
349  
350  
351  
352  
353  
354  
355  
356  
357  
358  
359  
360  
361  
362  
363  
364  
365  
366  
367  
368  
369  
370  
371  
372  
373  
374  
375  
376  
377  
378  
379  
380  
381  
382  
383  
384  
385  
386  
387  
388  
389  
390  
391  
392  
393  
394  
395  
396  
397  
398  
399  
400  
401  
402  
403  
404  
405  
406  
407  
408  
409  
410  
411  
412  
413  
414  
415  
416  
417  
418  
419  
420  
421  
422  
423  
424  
425  
426  
427  
428  
429  
430  
431  
432  
433  
434  
435  
436  
437  
438  
439  
440  
441  
442  
443  
444  
445  
446  
447  
448  
449  
450  
451  
452  
453  
454  
455  
456  
457  
458  
459  
460  
461  
462  
463  
464  
465  
466  
467  
468  
469  
470  
471  
472  
473  
474  
475  
476  
477  
478  
479  
480  
481  
482  
483  
484  
485  
486  
487  
488  
489  
490  
491  
492  
493  
494  
495  
496  
497  
498  
499  
500  
501  
502  
503  
504  
505  
506  
507  
508  
509  
510  
511  
512  
513  
514  
515  
516  
517  
518  
519  
520  
521  
522  
523  
524  
525  
526  
527  
528  
529  
530  
531  
532  
533  
534  
535  
536  
537  
538  
539  
540  
541  
542  
543  
544  
545  
546  
547  
548  
549  
550  
551  
552  
553  
554  
555  
556  
557  
558  
559  
560  
561  
562  
563  
564  
565  
566  
567  
568  
569  
570  
571  
572  
573  
574  
575  
576  
577  
578  
579  
580  
581  
582  
583  
584  
585  
586  
587  
588  
589  
590  
591  
592  
593  
594  
595  
596  
597  
598  
599  
600  
601  
602  
603  
604  
605  
606  
607  
608  
609  
610  
611  
612  
613  
614  
615  
616  
617  
618  
619  
620  
621  
622  
623  
624  
625  
626  
627  
628  
629  
630  
631  
632  
633  
634  
635  
636  
637  
638  
639  
640  
641  
642  
643  
644  
645  
646  
647  
648  
649  
650  
651  
652  
653  
654  
655  
656  
657  
658  
659  
660  
661  
662  
663  
664  
665  
666  
667  
668  
669  
670  
671  
672  
673  
674  
675  
676  
677  
678  
679  
680  
681  
682  
683  
684  
685  
686  
687  
688  
689  
690  
691  
692  
693  
694  
695  
696  
697  
698  
699  
700  
701  
702  
703  
704  
705  
706  
707  
708  
709  
710  
711  
712  
713  
714  
715  
716  
717  
718  
719  
720  
721  
722  
723  
724  
725  
726  
727  
728  
729  
730  
731  
732  
733  
734  
735  
736  
737  
738  
739  
740  
741  
742  
743  
744  
745  
746  
747  
748  
749  
750  
751  
752  
753  
754  
755  
756  
757  
758  
759  
760  
761  
762  
763  
764  
765  
766  
767  
768  
769  
770  
771  
772  
773  
774  
775  
776  
777  
778  
779  
780  
781  
782  
783  
784  
785  
786  
787  
788  
789  
790  
791  
792  
793  
794  
795  
796  
797  
798  
799  
800  
801  
802  
803  
804  
805  
806  
807  
808  
809  
810  
811  
812  
813  
814  
815  
816  
817  
818  
819  
820  
821  
822  
823  
824  
825  
826  
827  
828  
829  
830  
831  
832  
833  
834  
835  
836  
837  
838  
839  
840  
841  
842  
843  
844  
845  
846  
847  
848  
849  
850  
851  
852  
853  
854  
855  
856  
857  
858  
859  
860  
861  
862  
863  
864  
865  
866  
867  
868  
869  
870  
871  
872  
873  
874  
875  
876  
877  
878  
879  
880  
881  
882  
883  
884  
885  
886  
887  
888  
889  
890  
891  
892  
893  
894  
895  
896  
897  
898  
899  
900  
901  
902  
903  
904  
905  
906  
907  
908  
909  
910  
911  
912  
913  
914  
915  
916  
917  
918  
919  
920  
921  
922  
923  
924  
925  
926  
927  
928  
929  
930  
931  
932  
933  
934  
935  
936  
937  
938  
939  
940  
941  
942  
943  
944  
945  
946  
947  
948  
949  
950  
951  
952  
953  
954  
955  
956  
957  
958  
959  
960  
961  
962  
963  
964  
965  
966  
967  
968  
969  
970  
971  
972  
973  
974  
975  
976  
977  
978  
979  
980  
981  
982  
983  
984  
985  
986  
987  
988  
989  
990  
991  
992  
993  
994  
995  
996  
997  
998  
999  
1000

Statin use has not been found to affect prostate cancer mortality in trials testing their efficacy in  
secondary prevention of cardiovascular disease.<sup>27</sup> However, in these trials cancer was often an  
exclusion criterion. On the other hand, it may be that statin treatment has more impact on hormone-  
dependent cancers which are underrepresented in these studies. In a randomized clinical trial focusing  
on prostate cancer patients 80 mg of atorvastatin has been found to reduce tumor proliferation activity  
compared to placebo after minimum exposure of 21 days.<sup>28</sup> Similar results were seen after treatment  
with fluvastatin, although in a non-randomized and uncontrolled setting.<sup>29</sup> Nevertheless, clinical  
efficacy of statins in preventing progression of prostate cancer has not been tested in a randomized  
placebo-controlled setting. Also, a recent post-hoc study of randomized clinical trial concluded that  
statin use was associated with decreased overall and PCa-specific mortality in men with ADT.<sup>30</sup>  
Therefore, it is important to do a trial testing effects of statins specifically in prostate cancer patients.

## Study objective

Primary objective for this phase III randomized double-blind placebo-controlled trial is to explore whether intervention with atorvastatin delays prostate cancer progression i.e. development of castration resistance compared to placebo during androgen deprivation therapy (ADT) for metastatic or recurrent prostate cancer. Secondary objectives include exploring whether atorvastatin lowers prostate cancer-specific or overall mortality compared to placebo, and to demonstrate whether changes in serum lipid parameters predict disease recurrence and occurrence of adverse tumor genomic traits predicting castration resistance among prostate cancer patients during ADT.

## Methods and analysis

### Study setting

Study flow, study settings, and other information are presented in Figure 1 and Table 1. The study recruitment target is 400 participants who start ADT as primary management of *de novo* metastatic prostate cancer or as secondary management for prostate cancer recurrence after localized treatment. Participants can be high-risk M0 or M1 stage, main inclusion criterion is that long-term ADT treatment is started. These men will be randomized 1:1 (200 + 200) to receive either 80 mg of atorvastatin daily or placebo until disease recurrence i.e. development of castration resistance, death, or maximum of ten years. Sample size is based on a power calculation from a previous retrospective study.<sup>23</sup>

The study will be carried out in collaboration between urological departments of University Hospitals and central hospitals in Finland, the Herlev University Hospital in Denmark, and the Tartu University Hospital in Estonia (Table 1).

Study data were collected and managed using REDCap electronic data capture tools hosted at Tampere University.<sup>31,32</sup> Only the primary investigators, study nurses, and registered study co-investigator from each participating site will have access to the platform. All laboratory results, symptoms, and results from imaging studies done at the discretion of the attending clinicians are recorded in the database. All clinical decisions besides the study drug, e.g. use of early chemotherapy, abiraterone, or other drugs in adjunct with ADT will be up to the discretion of the attending clinician and allowed but will also be recorded in the trial database.

Follow-up is continued until development of castration resistance, death, or maximum of 10 years. Participants are given the opportunity to carry on with the intervention even after development of

1  
2  
3 castration resistance to observe effects on survival. Unblinding will be performed after recruitment  
4 target has been reached and all participants have been followed for minimum of 12 months.  
5  
6  
7

8 Castration resistance is defined as either PSA progression (three consecutive rises of PSA measured  
9 at least 1 week apart with two > 50% increases over the nadir and PSA > 2 ng/ml) or radiological  
10 progression (appearance of two or more lesions in bone scan or soft tissue enlargement as per RECIST  
11 criteria) while serum testosterone is at the castrate level (< 50 ng/ml or 1.7 nmol/l).  
12  
13  
14  
15

16 For men who initiate statin use during the study period for clinical indications, the study drug is  
17 dropped but the study follow-up is continued. These men will be included in the final analysis  
18 according to the intention-to-treat principle within their allocated study arm.  
19  
20  
21

22 In case of intolerable side-effects as judged by either the participant or the attending physician, the  
23 study drug is stopped, and these men will be analyzed according to the intention-to-treat principle.  
24  
25  
26

27 Participants who discontinue follow-up or deviate from the study protocol for any reason will be  
28 given the chance to remain or return to follow-up to allow intention-to-treat analyses.  
29  
30

### 31 **Inclusion and exclusion criteria**

32  
33  
34 Inclusion criteria for participants are histopathologically confirmed metastatic adenocarcinoma of the  
35 prostate or high-risk M0 stage recurrent prostate cancer for which androgen deprivation or  
36 antiandrogen therapy is initiated no longer than 3 months before recruitment, willingness to  
37 participate, and signing of informed consent (Figure 1).  
38  
39  
40

41  
42 Exclusion criteria for participants are regular statin use at the time of recruitment or within 6 months  
43 of it, previous adverse effects during statin therapy, familial hypercholesterolemia or very high total  
44 cholesterol (9.3 mmol/l or above), clinically significant renal (serum creatinine above 170  $\mu$ mol/l) or  
45 liver insufficiency (serum alanine aminotransferase more than two times above the upper limit of  
46 normal range), and use of drugs that may interact with statins (St John's Wort, HIV protease  
47 inhibitors, ciclosporin, macrolide antibiotics, fucidic acid, phenytoin, carbamazepine, dronedarone,  
48 or oral antifungal medication) (Figure 1).  
49  
50  
51  
52  
53  
54

### 55 **Study endpoints**

56  
57 Primary endpoint is the time to disease progression after starting ADT/antiandrogen therapy.  
58 Secondary endpoints are 1); prostate cancer-specific mortality and overall survival, 2); change in  
59  
60



1  
2  
3 serum cholesterol during the intervention and its role in predicting time to disease recurrence in the  
4 placebo arm, 3); occurrence of adverse tumor traits predicting development of castration resistance  
5 in circulating cell free DNA, 4); changes in fasting blood glucose during ADT, 5); occurrence of  
6 cardiovascular events during ADT, and 6); Quality of life (QoL) during ADT.  
7  
8  
9

## 10 **Study flow**

11  
12  
13 Study flow and schedule is presented in Figure 1 and Table 2. Patients are recruited at urology  
14 outpatient clinic at urologists' visits. If the inclusion criteria are met and the exclusion criteria are not  
15 and the participant signs informed consent form, he is given a study number (ranging between E-001  
16 to E-400) and he receives either 80 mg atorvastatin or placebo according to the study arm randomly  
17 allocated for the study number. No blocking or other restrictions will be implemented for  
18 randomization. Only the national study coordinator in each country will be able to see which study  
19 arm the participant has been randomized to. The participant will then receive first dose of the  
20 respective study drug randomized to his study number. The drug boxes and capsules containing  
21 atorvastatin and placebo will be of identical outlook. All researchers, nurses, and study participants  
22 will remain blinded to the allocation sequence until termination of the study and closure of the study  
23 data.  
24  
25  
26  
27  
28  
29  
30  
31  
32

33 Control visits are scheduled at 6-month intervals to suit common clinical practice. Control visits are  
34 done by a clinician, complemented with measurements done by a research nurse. For each control  
35 visit the participant returns remaining capsules from the previously delivered ration and will receive  
36 a new one according to his study number. Number of the remaining capsules will be counted and  
37 saved in the trial database to monitor compliance. In every visit serum PSA, alkaline phosphatase,  
38 creatinine, and fasting glucose will be measured (Table 2) and the participant is asked about  
39 symptoms that are suggestive of metastases and about possible adverse effects of the study drug.  
40 Serum creatine kinase is measured at the baseline.  
41  
42  
43  
44  
45  
46  
47

48 Blood samples are taken and stored at 6-month intervals to monitor changes in tumor markers and  
49 occurrence of adverse tumor characteristics after initiation of ADT. Quality of life during the  
50 intervention will be charted once a year using validated WHOQOL-BREF quality of life  
51 questionnaire.<sup>33</sup>  
52  
53  
54

55 Follow-up is continued until development of castration resistance, drop out from the study, death, or  
56 maximum of ten years. Participants developing castration resistance are given an opportunity to carry  
57 on with their assigned treatment as statins have been linked to longer cancer-specific survival.  
58  
59  
60

1  
2  
3 Unblinding will be performed after recruitment target has been reached and all participants have been  
4 followed for minimum of 12 months.  
5  
6

7 Prostate cancer treatment apart from the study drug will be up to the discretion of the attending  
8 clinician. All laboratory results, symptoms, and possible imaging results will be recorded in the trial  
9 database. All clinical decisions regarding early chemotherapy and imaging will be made on the  
10 discretion of the clinician and recorded in the trial database.  
11  
12  
13

### 14 15 **Stored blood samples** 16

17  
18 Separate whole blood (for RNA and DNA isolation), plasma, and serum samples are taken at each  
19 control visit at 6-month intervals and stored for mass-spectrometric and nuclear magnetic resonance  
20 (NMR)-based determination of serum lipidome. These samples will also be used for RNA and whole  
21 genome sequencing of mutations and genetic modifications predicting disease recurrence and  
22 metastasis, such as BRCA1/2, ERG, MYC, TP53, ATM, PTEN, and AR splice variants.<sup>34,35</sup> Also  
23 hypoxia markers will be measured.<sup>36</sup>  
24  
25  
26  
27  
28

29 For participants with confirmed metastases in the bone or soft tissues, amount of cell free DNA from  
30 the plasma will be measured before ADT initiation and again at castration resistance development for  
31 sequencing and detection of genetic modifications predicting metastases.<sup>34,35</sup> Selected patients are  
32 also imaged with positron emission tomography (PET) scan using 18F-2-  
33 nitroimidazolpentafluoropropylacetamide (EF5)<sup>37</sup> to monitor hypoxia and FDG-PET to evaluate  
34 immune responses<sup>38</sup> in the primary tumor and the metastases during the atorvastatin intervention.  
35  
36  
37  
38  
39  
40

### 41 **Power calculations** 42

43  
44 In a cohort study by Harshman et al.<sup>23</sup>, among men starting ADT, 58% of the statin users and 75% of  
45 non-users of statins progress to castration resistance during median 5.8 years. We used these crude  
46 percentages for sample size calculations.  
47  
48

49 With alfa and beta values of 0.05 and 0.20 (power=0.80) the difference of 58% vs. 75% would require  
50 132 + 132 observations, if group sizes are assumed to be similar. The program “PS - Power and  
51 sample size, version 3.1.2” was used for the calculation. To take possible dropouts into account we  
52 set the sample size to 400 men, 200 in each study arm.  
53  
54  
55  
56

57 The median time to disease progression is assumed to be 12-15 months for patients with *de novo*  
58 metastatic disease and 33 months for patients recurring after primary therapy.<sup>3-7</sup> Therefore, the  
59  
60

1  
2  
3  
4  
5  
6  
7  
8  
9  
10  
11  
12  
13  
14  
15  
16  
17  
18  
19  
20  
21  
22  
23  
24  
25  
26  
27  
28  
29  
30  
31  
32  
33  
34  
35  
36  
37  
38  
39  
40  
41  
42  
43  
44  
45  
46  
47  
48  
49  
50  
51  
52  
53  
54  
55  
56  
57  
58  
59  
60

intervention will continue until castration resistance, death, or for maximum of 10 years. Post hoc follow-up will continue after the intervention.

It has to be noted that the number of studies published on this topic is low and, in the absence of randomized evidence on this topic, the power calculation is based on results of epidemiological study prone to residual bias. Therefore, an interim analysis will be performed after the first 100 participants have met the primary endpoint, i.e. progressed into castration resistance. Without lifting the blinding, the power calculations are repeated to verify whether the chosen sample size has adequate statistical power to detect statistically significant difference of the effect size observed between the randomization groups at that time. If the calculations suggest that a larger sample size is needed for the trial, the study protocol will be amended with updated recruitment target.

### Statistical methods

Distribution balance of prostate cancer clinical characteristics such as TNM stage at diagnosis, Gleason score, and PSA at time of diagnosis will be compared between the study arms using chi-square test for categorical variables and Mann-Whitney U-test, Student's t-test, or ANOVA for continuous variables depending on whether they follow normal distribution.

Recurrence-free time, i.e. time from ADT initiation to castration resistance, will be compared between the study arms using Kaplan-Meier curves and log-rank test. Risk of death, as well as risk for occurrence of adverse tumor traits among men receiving atorvastatin compared to men receiving placebo will be estimated using Cox proportional hazards regression.

Statistical significance of the association between changes in serum lipid levels and occurrence of adverse tumor genomic traits will be estimated using ANOVA or Mann-Whitney U-test depending on the distribution normality.

Subgroup analyses will be performed stratified by type of ADT or antiandrogen therapy initially selected; GnRH agonists/antagonists, antiandrogen, orchiectomy, or other. Men who start with antiandrogen therapy often change to GnRH agonists/antagonists or orchiectomy when PSA increases during ADT. This is allowed and PSA recurrence during antiandrogen therapy is not considered as disease progression as serum testosterone needs to be at castrate level as well for meeting the primary endpoint.

Another subgroup analysis will be stratified by whether or not the participants have received local therapy (radiation or surgery) for prostate cancer in addition to ADT and by type of additional therapy

1  
2  
3 participant has received; docetaxel, abiraterone, enzalutamide, or apalutamide at hormone-sensitive  
4 stage in addition to ADT.  
5

6  
7 All analyses will include only participants with available data, imputations will not be used.  
8  
9

## 10 **Ethics and dissemination**

11  
12  
13 This study is approved by the regional ethics committee of Pirkanmaa Hospital District, Science  
14 center, Tampere, Finland (R18065M). All participants read and sign informed consent form before  
15 study entry. The results of this study will be published in international peer reviewed journals.  
16  
17

18  
19 The trial is ethical for the following reasons 1); The study aims to improve treatment of metastatic  
20 prostate cancer, which is the second most common cause of cancer death in Western countries, 2);  
21 the potential scientific and societal benefits from the project are substantial. If the study hypothesis  
22 proves to be right, it will provide an entirely new way to prevent and/or delay progression of  
23 metastatic prostate cancer with atorvastatin, a drug that is cheap, well-tolerated, and with established  
24 cardiovascular benefits, 3); the study drug (atorvastatin) is known to be well-tolerated and it is  
25 currently widely used in management of hypercholesterolemia and cardiovascular disease. The  
26 adverse effects caused by the drug are usually mild and transient after stopping the study drug, and  
27 4); randomized, placebo-controlled design ensures the study will produce highest quality evidence  
28 that will change prostate cancer treatment guidelines if the hypothesis proves to be right.  
29  
30  
31  
32  
33  
34  
35

36  
37 After publication of results for the primary endpoints, anonymized summary metadata and statistical  
38 code will be made openly available. The data will not include any information that could make it  
39 possible to identify a given participant.  
40  
41  
42

## 43 **Quality control**

44  
45  
46 The study steering committee includes investigators from each participating recruitment center. The  
47 steering committee will meet twice a year to oversee trial progression of the recruitment, integrity of  
48 collected data and discuss possible protocol amendments.  
49  
50

51  
52 External trained study monitors independent from the study sponsors ensure the data quality and good  
53 clinical practice by making regular yearly check-up visits to participating study centers. This will be  
54 separately arranged in each participating country.  
55  
56  
57

## 58 **Reporting and registering of adverse effects**

1  
2  
3 The participants are advised to contact the researchers in case of suspected adverse effect related to  
4 the study drug. If the side-effects are intolerable the study drug will be discontinued. In uncertain  
5 cases serum levels of creatine kinase, alanine aminotransferase and creatinine are checked to see if  
6 any of these have changed considerably compared to the baseline. If the laboratory tests are not  
7 normal, or if the participant or the attending physician finds the side-effects alarming the study drug  
8 will be discontinued. Study database records specifically most common adverse effects muscular  
9 pain, elevated fasting blood glucose (> 6,1 mmol/l) and elevated serum creatine kinase (>280 U/l),  
10 even when they do not lead to discontinuation of the study drug.  
11  
12  
13  
14  
15  
16  
17

18 Trial database includes separate question for serious adverse effects as evaluated by CTCAE criteria,  
19 version 5.0. If serious side-effects are reported, trial database asks to fulfill separate query where  
20 detailed description of the adverse effect is given according to CTCAE criteria. Study sponsor and  
21 coordinator will be automatically notified via e-mail if serious adverse effect is reported in the  
22 database. All serious adverse effect that threatens life or health are reported to national authority  
23 (FIMEA in Finland) within 7 days of detection. If a life-threatening adverse effect is suspected  
24 blinding will be lifted for the participant in case to see whether he has received atorvastatin or placebo.  
25 Unexpected adverse effects will be reported to national authority within 15 days of detection.  
26  
27  
28  
29  
30  
31  
32

### 33 **Patients and public involvement**

34  
35 In the design phase of the trial, primary investigator presented the study protocol in numerous public  
36 events, including patient advocacy group meetings, giving opportunity for the audience to give  
37 feedback and suggestions how to improve the study. Patient advocacy organizations of prostate  
38 cancer patients are actively involved in finding subjects for the study through announcements in their  
39 journals and by allowing investigators frequently promote the study in their meetings. Study results  
40 will be reported also in patient organization journals and social media sites for maximum visibility  
41 and distribution of trial outcomes.  
42  
43  
44  
45  
46  
47  
48

### 49 **References**

- 50  
51 1. Finnish cancer registry statistics: <http://stats.cancerregistry.fi/stats/eng/veng0003m0.html>  
52  
53 2. Mäklin S, Rissanen P. Cancer expenses in Finland:  
54 <http://www.cancer.fi/@Bin/47734/Syöpien+aiheuttamat+kustannukset.pdf>  
55  
56 3. Ross RW Xie W, Regan MM, Pomerantz M, *et al.* Efficacy of androgen deprivation therapy  
57 (ADT) in patients with advanced prostate cancer: association between Gleason score,  
58  
59  
60

- 1  
2  
3 prostate-specific antigen level, and prior ADT exposure with duration of ADT effect. *Cancer*  
4 2008;**112**:1247-53. doi: 10.1002/cncr.23304.  
5  
6  
7 4. Botrel TE, Clark O, Lima Pompeo AC, *et al.* Efficacy and Safety of Combined Androgen  
8 Deprivation Therapy (ADT) and Docetaxel Compared with ADT Alone for Metastatic  
9 Hormone-Naïve Prostate Cancer: A Systematic Review and Meta-Analysis. *PLoS One*  
10 2016;**11**:e0157660. doi: 10.1371/journal.pone.0157660.  
11  
12  
13 5. Sweeney CJ, Chen YH, Carducci M, *et al.* Chemohormonal Therapy in Metastatic Hormone-  
14 Sensitive Prostate Cancer. *N Engl J Med* 2015;**373**:737-46. doi: 10.1056/NEJMoa1503747  
15  
16  
17 6. Seo WI, Kang PM, Kim TH, *et al.* Primary androgen deprivation therapy for prostate cancer  
18 in koreans: a retrospective multicenter study. *World J Mens Health*. 2014;**32**(3):159-66.  
19  
20  
21 7. Mottet N, Van Damme J, Loulidi S, Russel C, Leitenberger A, Wolff JM. Intermittent  
22 hormonal therapy in the treatment of metastatic prostate cancer: a randomized trial. *BJU Int*  
23 2012;**110**:1262-9. doi: 10.1111/j.1464-410X.2012.11120.x.  
24  
25  
26 8. Arthur R, Møller H, Garmo H, *et al.* Association between baseline serum glucose,  
27 triglycerides and total cholesterol, and prostate cancer risk categories. *Cancer Med*  
28 2016;**5**:1307-18. doi: 10.1002/cam4.665  
29  
30  
31 9. Murtola TJ, Syväälä H, Pennanen P, *et al.* Comparative effects of high and low-dose  
32 simvastatin on prostate epithelial cells: the role of LDL. *Eur J Pharmacol* 2011;**673**:96-100.  
33 doi: 10.1016/j.ejphar.2011.10.022.  
34  
35  
36 10. Murtola TJ, Syväälä H, Pennanen P, *et al.* The importance of LDL and cholesterol metabolism  
37 for prostate epithelial cell growth. *PLoS One* 2012;**7**:e39445. doi:  
38 10.1371/journal.pone.0039445.  
39  
40  
41 11. Ackerman D, Simon MC. Hypoxia, lipids, and cancer: surviving the harsh tumor  
42 microenvironment. *Trends Cell Biol* 2014;**24**:472-8. doi: 10.1016/j.tcb.2014.06.001.  
43  
44  
45 12. Herber DL, Cao W, Nefedova Y *et al.* Lipid accumulation and dendritic cell dysfunction in  
46 cancer. *Nat Med* 2010;**16**:880-6. doi: 10.1038/nm.2172  
47  
48  
49 13. Han W, Gao S, Barrett D, *et al.* Reactivation of androgen receptor-regulated lipid biosynthesis  
50 drives the progression of castration-resistant prostate cancer. *Oncogene* 2018;**37**:710-21. doi:  
51 10.1038/onc.2017.385.  
52  
53  
54 14. Raval AD, Thakker D, Negi H, *et al.* Association between statins and clinical outcomes  
55 among men with prostate cancer: a systematic review and meta-analysis. *Prostate Cancer*  
56 *Prostatic Dis* 2016;**19**:222. doi: 10.1038/pcan.2016.3  
57  
58  
59  
60



15. Barfeld SJ, Itkonen HM, Urbanucci A, *et al.* Androgen-regulated metabolism and biosynthesis in prostate cancer. *Endocr Relat Cancer* 2014;**21**:T57-66. doi: 10.1530/ERC-13-0515.
16. Dambal S, Howard LE, Allott EH, *et al.* Serum Lipids prior to Starting Androgen Deprivation Therapy and Risk of Castration Resistant Prostate Cancer and Metastasis: Results from the SEARCH Database. *J Urol* 2020;**203**:120-7. doi: 10.1097/JU.0000000000000494
17. Van Rompay MI, Solomon KR, Nickel JC, *et al.* Prostate cancer incidence and mortality among men using statins and non-statin lipid-lowering medications. *Eur J Cancer* 2019;**112**:118-26. doi: 10.1016/j.ejca.2018.11.033.
18. Kumar A, Riviere P, Luterstein E, *et al.* Associations among statins, preventive care, and prostate cancer mortality. *Prostate Cancer Prostatic Dis* 2020. doi: 10.1038/s41391-020-0207-5
19. Murai T. Cholesterol lowering: role in cancer prevention and treatment. *Biol Chem* 2015;**396**:1-11. doi: 10.1515/hsz-2014-0194.
20. Garcia-Ruiz C, Morales A, Fernandez-Checa JC. Statins and protein prenylation in cancer cell biology and therapy. *Anticancer Agents Med Chem* 2012;**12**:303-15. doi: 10.2174/187152012800228715
21. Armandari I, Hamid AR, Verhaegh G, *et al.* Intratumoral steroidogenesis in castration-resistant prostate cancer: a target for therapy. *Prostate Int* 2014;**2**:105-13. doi: 10.12954/PI.14063.
22. Mokarram P, Alizadeh J, Razban V, *et al.* Interconnection of Estrogen/Testosterone Metabolism and Mevalonate Pathway in Breast and Prostate Cancers. *Curr Mol Pharmacol* 2017;**10**:86-114. doi: 10.2174/1874467209666160112125631.
23. Harshman LC, Wang X, Nakabayashi M, *et al.* Statin use at the time of initiation of androgen deprivation therapy and time to progression in patients with hormone-sensitive prostate cancer. *JAMA Oncol* 2015;**1**:495-504. doi: 10.1001/jamaoncol.2015.0829.
24. Jung J, Lee C, Lee C, *et al.* Effects of statin use on the response duration to androgen deprivation therapy in metastatic prostate cancer. *Korean J Urol* 2015;**56**:630-6. doi: 10.4111/kju.2015.56.9.630.
25. Syväälä H, Pennanen P, Bläuer M, *et al.* Additive inhibitory effects of simvastatin and enzalutamide on androgen-sensitive LNCaP and VCaP prostate cancer cells. *Biochem Biophys Res Commun* 2016;**481**:46-50. doi: 10.1016/j.bbrc.2016.11.021

- 1
  - 2
  - 3
  - 4
  - 5
  - 6
  - 7
  - 8
  - 9
  - 10
  - 11
  - 12
  - 13
  - 14
  - 15
  - 16
  - 17
  - 18
  - 19
  - 20
  - 21
  - 22
  - 23
  - 24
  - 25
  - 26
  - 27
  - 28
  - 29
  - 30
  - 31
  - 32
  - 33
  - 34
  - 35
  - 36
  - 37
  - 38
  - 39
  - 40
  - 41
  - 42
  - 43
  - 44
  - 45
  - 46
  - 47
  - 48
  - 49
  - 50
  - 51
  - 52
  - 53
  - 54
  - 55
  - 56
  - 57
  - 58
  - 59
  - 60
26. Yang H, Pang L, Hu X, *et al.* The effect of statins on advanced prostate cancer patients with androgen deprivation therapy or abiraterone/enzalutamide: A systematic review and meta-analysis. *J Clin Pharm Ther* 2020;**45**:488-95. doi: 10.1111/jcpt.13092
27. Lv HL, Jin DM, Liu M, *et al.* Long-term efficacy and safety of statin treatment beyond six years: a meta-analysis of randomized controlled trials with extended follow-up. *Pharmacol Res* 2014;**81**:64-73. doi: 10.1016/j.phrs.2014.02.006.
28. Murtola T, Riikonen J, Syvälä H, *et al.* Atorvastatin Versus Placebo for Prostate Cancer Before Radical Prostatectomy-A Randomized, Double-blind, Placebo-controlled Clinical Trial. *Eur Urol* 2018;**74**:697-701. doi: 10.1016/j.eururo.2018.06.037.
29. Longo J, Hamilton RJ, Masoomian M, *et al.* A pilot window-of-opportunity study of preoperative fluvastatin in localized prostate cancer. *Prostate Cancer Prostatic Dis* 2020;**23**:630-37. doi: 10.1038/s41391-020-0221-7
30. Hamilton RJ, Ding K, Crook JM, *et al.* The Association Between Statin Use and Outcomes in Patients Initiating Androgen Deprivation Therapy. *Eur Urol* 2020 (article in press) <https://doi.org/10.1016/j.eururo.2020.12.031>
31. Harris PA, Taylor R, Thielke R, *et al.* Research electronic data capture (REDCap) – A metadata-driven methodology and workflow process for providing translational research informatics support. *J Biomed Inform* 2009;**42**:377-81. doi: 10.1016/j.jbi.2008.08.010
32. Harris PA, Taylor R, Minor BL, *et al.* The REDCap consortium: Building an international community of software partners. *J Biomed Inform* 2019;**95**:103208. doi: 10.1016/j.jbi.2019.103208.
33. WHOQOL-BREF, The World Health Organization Quality of Life, THL
34. Mateo J, Boysen G, Barbieri CE, *et al.* DNA repair in prostate cancer: biology and clinical implications. *Eur Urol* 2017;**71**:417-25. doi: 10.1016/j.eururo.2016.08.037
35. Xu J, Qiu Y. Role of androgen receptor splice variants in prostate cancer metastasis. *Asian J Urol* 2016;**3**:177-84. doi: 10.1016/j.ajur.2016.08.003.
36. Le QT, Courter D. Clinical biomarkers for hypoxia targeting. *Cancer Metastasis Rev* 2008;**27**:351-62. doi: 10.1007/s10555-008-9144-9
37. Stieb S, Eleftheriou A, Warnock G, *et al.* Longitudinal PET imaging of tumor hypoxia during the course of radiotherapy. *Eur J Nucl Med Mol Imaging* 2018;**45**:2201-17. doi: 10.1007/s00259-018-4116-y
38. Hunt SJ, Seraj SM, Alavi A. PET Assessment of Immune Effects from Interventional Oncology Procedures. *PET Clin* 2019;**14**:477-85. doi: 10.1016/j.cpet.2019.06.007.



1  
2  
3 **Authors' contributions:** Teemu Murtola is the primarily investigator of this study and designed the  
4 study with the help from other authors. Aino Siltari and Teemu Murtola wrote the first draft of the  
5 manuscript. All other authors further contributed to manuscript preparation and accepted the final  
6 version of the manuscript.  
7  
8  
9

10  
11 **Funding:** This study is supported by grants from Finnish Cancer Foundation (grant numbers 024194  
12 and 3122800563 (TJM) and 16112016 (TL)), Nordic Cancer Union (grant number MS793 (TJM)),  
13 Päivikki and Sakari Sohlberg Foundation (grant number 31228005901 (AS)), competitive research  
14 grant of Pirkanmaa hospital district (grant number 9X032 (TJM) and grant X51001 (TL)), and the  
15 Academy of Finland (grants numbers 322098 (TL), and 3121330724 (TJM)).  
16  
17  
18  
19

20 **Disclaimer:** None of the funders has a role in the design, management, analysis or interpretation of  
21 data, or writing and publication of results.  
22  
23  
24

25 **Competing interests:** Peter Østergren: honorarium as speaker from Ipsen A/S, Ferring  
26 Pharmaceuticals, and Astellas Pharma. Mikkel Fode: consultant fees and honorarium as speaker from  
27 Astellas and Ferring. Hanna Ronkainen: consultant fees from Bayer AB and honorarium as speaker  
28 from Sanofi. Teemu J Murtola: Consultant fees from Astellas, Janssen, speaker's honorarium from  
29 Astellas, Janssen and Sanofi, participation in scientific meetings at the expense of Ferring, Pfizer, and  
30 Sanofi, stockholder for Arocell AB. Peter Boström: consultant fees from Astellas Pharma. All other  
31 authors: No competing interests to declare.  
32  
33  
34  
35  
36  
37

38 **Data sharing:** There are no additional unpublished data at this point of this study.  
39  
40

41 Captions to Figure and Tables:  
42  
43  
44

45 Figure 1. Study flow with inclusion and exclusion criteria.  
46  
47

48 Table 1. Study setting of Impact of atorvastatin on prostate cancer after initiation of androgen  
49 deprivation therapy -clinical trial  
50  
51

52 Table 2. Study flow and timing of the laboratory and blood sample collection  
53  
54  
55  
56  
57  
58  
59  
60

1  
2  
3  
4  
5  
6  
7  
8  
9  
10  
11  
12  
13  
14  
15  
16  
17  
18  
19  
20  
21  
22  
23  
24  
25  
26  
27  
28  
29  
30  
31  
32  
33  
34  
35  
36  
37  
38  
39  
40  
41  
42  
43  
44  
45  
46  
47  
48  
49  
50  
51  
52  
53  
54  
55  
56  
57  
58  
59  
60

| <b>Study settings</b>                         |                                                                                                                                                                                                                                                                                                                                                                                                                                                                                                                                                                                             |
|-----------------------------------------------|---------------------------------------------------------------------------------------------------------------------------------------------------------------------------------------------------------------------------------------------------------------------------------------------------------------------------------------------------------------------------------------------------------------------------------------------------------------------------------------------------------------------------------------------------------------------------------------------|
| Primary registry and trial identifying number | Clinicaltrials.gov NCT04026230                                                                                                                                                                                                                                                                                                                                                                                                                                                                                                                                                              |
| Date of registration in primary registry      | July 19, 2019                                                                                                                                                                                                                                                                                                                                                                                                                                                                                                                                                                               |
| Secondary identifying numbers                 | Eudra-CT: 2016-004774-17, Protocol code: ESTO2                                                                                                                                                                                                                                                                                                                                                                                                                                                                                                                                              |
| Source(s) of monetary or material support     | Tampere University Hospital, Finland                                                                                                                                                                                                                                                                                                                                                                                                                                                                                                                                                        |
| Primary sponsor                               | Tampere University Hospital, Finland                                                                                                                                                                                                                                                                                                                                                                                                                                                                                                                                                        |
| Secondary sponsor(s)                          | Helsinki University Hospital, Turku University Hospital, Central Finland Central Hospital, Kuopio University Hospital, Oulu University Hospital, Finland, Herlev Hospital, Denmark, University Hospital Tartu, Estonia                                                                                                                                                                                                                                                                                                                                                                      |
| Contact for public queries                    | Tampere University Hospital, Teemu Murtola, MD, PhD                                                                                                                                                                                                                                                                                                                                                                                                                                                                                                                                         |
| Contact for scientific queries                | Tampere University Hospital, Teemu Murtola, MD, PhD                                                                                                                                                                                                                                                                                                                                                                                                                                                                                                                                         |
| Public title                                  | Impact of atorvastatin on prostate cancer progression after initiation of androgen deprivation therapy                                                                                                                                                                                                                                                                                                                                                                                                                                                                                      |
| Scientific title                              | Impact of atorvastatin on prostate cancer progression after initiation of androgen deprivation therapy – lipid metabolism as a novel biomarker to predict prostate cancer progression – phase 3, double-blind randomized clinical trial FinnProstata XV                                                                                                                                                                                                                                                                                                                                     |
| Countries of recruitment                      | Finland, Denmark, Estonia                                                                                                                                                                                                                                                                                                                                                                                                                                                                                                                                                                   |
| Health condition studied                      | Metastatic or recurrent prostate cancer                                                                                                                                                                                                                                                                                                                                                                                                                                                                                                                                                     |
| Intervention                                  | Active comparator: Capsules of atorvastatin 80 mg, Placebo comparator: Similar capsules as in the atorvastatin arm, but without the active ingredient                                                                                                                                                                                                                                                                                                                                                                                                                                       |
| Key inclusion and exclusion criteria          | Inclusion criteria: Histopathologically confirmed metastatic adenocarcinoma of the prostate for which androgen deprivation or antiandrogen therapy is initiated no longer than 3 months before as the primary treatment<br>Willingness to participate and signing of informed consent<br>Exclusion criteria: Statin use at the time of recruitment or within 6 months of it, Previous adverse effects during statin therapy, familial hypercholesterolemia or very high total cholesterol, clinically significant renal or liver insufficiency, use of drugs that may interact with statins |
| Sexes eligible for study:                     | Male                                                                                                                                                                                                                                                                                                                                                                                                                                                                                                                                                                                        |
| Accepts healthy volunteers                    | No                                                                                                                                                                                                                                                                                                                                                                                                                                                                                                                                                                                          |
| Study type                                    | Interventional, Allocation: randomized, Intervention model: parallel assignment with 1:1 allocation ratio, Masking: double blind (subject, caregiver, investigator, outcomes assessor), Primary purpose: prevention, Phase III                                                                                                                                                                                                                                                                                                                                                              |
| Date of first enrolment                       | July 2019                                                                                                                                                                                                                                                                                                                                                                                                                                                                                                                                                                                   |
| Target sample size                            | 400                                                                                                                                                                                                                                                                                                                                                                                                                                                                                                                                                                                         |
| Recruitment status                            | Recruiting                                                                                                                                                                                                                                                                                                                                                                                                                                                                                                                                                                                  |
| Primary outcome(s)                            | Castration resistance                                                                                                                                                                                                                                                                                                                                                                                                                                                                                                                                                                       |
| Key secondary outcomes                        | Lipid levels, Prostate cancer mortality and overall survival, Circulating cell free DNA, Fasting blood glucose, Occurrence of cardiovascular events during ADT, Quality of life                                                                                                                                                                                                                                                                                                                                                                                                             |

1  
2  
3  
4  
5  
6  
7  
8  
9  
10  
11  
12  
13  
14  
15  
16  
17  
18  
19  
20  
21  
22  
23  
24  
25  
26  
27  
28  
29  
30  
31  
32  
33  
34  
35  
36  
37  
38  
39  
40  
41  
42  
43  
44  
45  
46  
47  
48  
49  
50  
51  
52  
53  
54  
55  
56  
57  
58  
59  
60

| Table 2. Study flow and timing of the laboratory and blood sample collection                |            |            |           |    |     |     |     |      |
|---------------------------------------------------------------------------------------------|------------|------------|-----------|----|-----|-----|-----|------|
| TIMEPOINT                                                                                   | Enrollment | Allocation | Follow-up |    |     |     |     |      |
|                                                                                             |            |            | 0         | 6m | 12m | 18m | 24m | etc* |
| <b>ENROLLMENT:</b>                                                                          |            |            |           |    |     |     |     |      |
| Eligibility screen                                                                          | x          |            |           |    |     |     |     |      |
| Informed consent                                                                            | x          |            |           |    |     |     |     |      |
| Allocation                                                                                  |            | x          |           |    |     |     |     |      |
| <b>INTERVENTIONS:+</b>                                                                      |            |            |           |    |     |     |     |      |
| Atorvastatin                                                                                |            |            | x         | x  | x   | x   |     |      |
| Placebo                                                                                     |            |            | x         | x  | x   | x   |     |      |
| <b>ASSESSMENTS:</b>                                                                         |            |            |           |    |     |     |     |      |
| Serum PSA                                                                                   |            |            | x         | x  | x   | x   |     |      |
| Alkaline phosphatase                                                                        |            |            | x         | x  | x   | x   |     |      |
| Creatinine                                                                                  | x          |            | x         | x  | x   | x   |     |      |
| Serum creatine kinase                                                                       | x          |            |           |    |     |     |     |      |
| Alanine aminotransferase                                                                    | x          |            |           |    |     |     |     |      |
| Fasting blood glucose                                                                       | x          |            | x         | x  | x   | x   |     |      |
| Lipid levels                                                                                | x          |            | x         | x  | x   | x   |     |      |
| Cell free DNA (subgroup)^                                                                   | x          |            |           |    |     |     |     |      |
| QoL                                                                                         | x          |            |           | x  |     |     | x   |      |
| m=month, y=year, QoL=quality of life, PSA=prostate-specific antigen                         |            |            |           |    |     |     |     |      |
| *follow-up until disease recurrence, death, or max. 10 years                                |            |            |           |    |     |     |     |      |
| + allocation 1:1 to have either 80 mg atorvastatin or placebo daily                         |            |            |           |    |     |     |     |      |
| ^Cell free DNA is measured before allocation and after occurrence of castration resistance. |            |            |           |    |     |     |     |      |

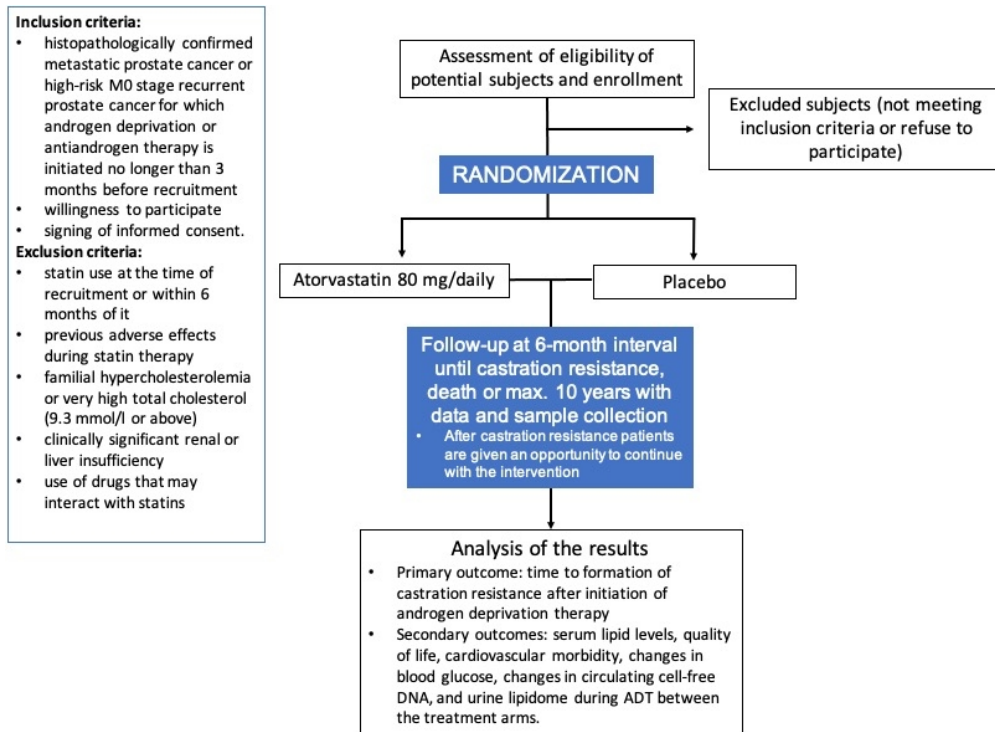

Study flow with inclusion and exclusion criteria.

284x208mm (72 x 72 DPI)

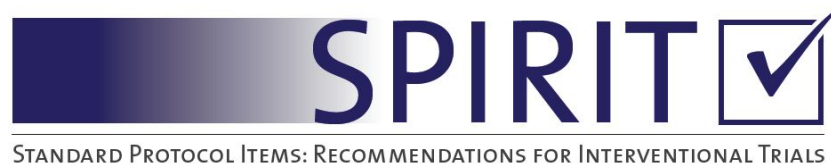

STANDARD PROTOCOL ITEMS: RECOMMENDATIONS FOR INTERVENTIONAL TRIALS

## SPIRIT 2013 Checklist: Recommended items to address in a clinical trial protocol and related documents\*

| Section/item                      | Item No | Description                                                                                                                                                                                                                                                                              | Addressed on page number |
|-----------------------------------|---------|------------------------------------------------------------------------------------------------------------------------------------------------------------------------------------------------------------------------------------------------------------------------------------------|--------------------------|
| <b>Administrative information</b> |         |                                                                                                                                                                                                                                                                                          |                          |
| Title                             | 1       | Descriptive title identifying the study design, population, interventions, and, if applicable, trial acronym                                                                                                                                                                             | _____ 1 _____            |
| Trial registration                | 2a      | Trial identifier and registry name. If not yet registered, name of intended registry                                                                                                                                                                                                     | _____ 2 _____            |
|                                   | 2b      | All items from the World Health Organization Trial Registration Data Set                                                                                                                                                                                                                 | _____                    |
| Protocol version                  | 3       | Date and version identifier                                                                                                                                                                                                                                                              | _____ 2 _____            |
| Funding                           | 4       | Sources and types of financial, material, and other support                                                                                                                                                                                                                              | _____ 14 _____           |
| Roles and responsibilities        | 5a      | Names, affiliations, and roles of protocol contributors                                                                                                                                                                                                                                  | _____ 1 _____            |
|                                   | 5b      | Name and contact information for the trial sponsor                                                                                                                                                                                                                                       | _____ 1 _____            |
|                                   | 5c      | Role of study sponsor and funders, if any, in study design; collection, management, analysis, and interpretation of data; writing of the report; and the decision to submit the report for publication, including whether they will have ultimate authority over any of these activities | _____ 14 _____           |
|                                   | 5d      | Composition, roles, and responsibilities of the coordinating centre, steering committee, endpoint adjudication committee, data management team, and other individuals or groups overseeing the trial, if applicable (see Item 21a for data monitoring committee)                         | _____ 10 _____           |

1 **Introduction**

2

3 Background and rationale 6a Description of research question and justification for undertaking the trial, including summary of relevant studies (published and unpublished) examining benefits and harms for each intervention \_\_\_ 3-4 \_\_\_

4

5

6 6b Explanation for choice of comparators \_\_\_ 3-4 \_\_\_

7

8 Objectives 7 Specific objectives or hypotheses \_\_\_ 5 \_\_\_

9

10 Trial design 8 Description of trial design including type of trial (eg, parallel group, crossover, factorial, single group), allocation ratio, and framework (eg, superiority, equivalence, noninferiority, exploratory) \_\_\_ 5-6 \_\_\_

11

12

13

14 **Methods: Participants, interventions, and outcomes**

15

16 Study setting 9 Description of study settings (eg, community clinic, academic hospital) and list of countries where data will be collected. Reference to where list of study sites can be obtained \_\_\_ 5-6 \_\_\_

17

18

19 Eligibility criteria 10 Inclusion and exclusion criteria for participants. If applicable, eligibility criteria for study centres and individuals who will perform the interventions (eg, surgeons, psychotherapists) \_\_\_ 6 \_\_\_

20

21

22 Interventions 11a Interventions for each group with sufficient detail to allow replication, including how and when they will be administered \_\_\_ 7-8 \_\_\_

23

24

25 11b Criteria for discontinuing or modifying allocated interventions for a given trial participant (eg, drug dose change in response to harms, participant request, or improving/worsening disease) \_\_\_ 6 \_\_\_

26

27

28 11c Strategies to improve adherence to intervention protocols, and any procedures for monitoring adherence (eg, drug tablet return, laboratory tests) \_\_\_ 7-8 \_\_\_

29

30

31 11d Relevant concomitant care and interventions that are permitted or prohibited during the trial \_\_\_ 8 \_\_\_

32

33

34 Outcomes 12 Primary, secondary, and other outcomes, including the specific measurement variable (eg, systolic blood pressure), analysis metric (eg, change from baseline, final value, time to event), method of aggregation (eg, median, proportion), and time point for each outcome. Explanation of the clinical relevance of chosen efficacy and harm outcomes is strongly recommended \_\_\_ 6-7 \_\_\_

35

36

37

38

39

40 Participant timeline 13 Time schedule of enrolment, interventions (including any run-ins and washouts), assessments, and visits for participants. A schematic diagram is highly recommended (see Figure) \_\_\_ 7-8, Table 2 \_\_\_

41

42

43

44

45

46

1 Sample size 14 Estimated number of participants needed to achieve study objectives and how it was determined, including \_\_\_\_\_ 8-9 \_\_\_\_\_  
 2 clinical and statistical assumptions supporting any sample size calculations

3  
 4 Recruitment 15 Strategies for achieving adequate participant enrolment to reach target sample size \_\_\_\_\_ 8-9 \_\_\_\_\_  
 5

6 **Methods: Assignment of interventions (for controlled trials)**

7  
 8 Allocation:

9  
 10 Sequence 16a Method of generating the allocation sequence (eg, computer-generated random numbers), and list of any \_\_\_\_\_ 7 \_\_\_\_\_  
 11 generation factors for stratification. To reduce predictability of a random sequence, details of any planned restriction  
 12 (eg, blocking) should be provided in a separate document that is unavailable to those who enrol participants  
 13 or assign interventions  
 14  
 15

16 Allocation 16b Mechanism of implementing the allocation sequence (eg, central telephone; sequentially numbered, \_\_\_\_\_ 7 \_\_\_\_\_  
 17 concealment opaque, sealed envelopes), describing any steps to conceal the sequence until interventions are assigned  
 18 mechanism  
 19

20 Implementation 16c Who will generate the allocation sequence, who will enrol participants, and who will assign participants to \_\_\_\_\_ 7 \_\_\_\_\_  
 21 interventions  
 22  
 23

24 Blinding (masking) 17a Who will be blinded after assignment to interventions (eg, trial participants, care providers, outcome \_\_\_\_\_ 7 \_\_\_\_\_  
 25 assessors, data analysts), and how  
 26

27 17b If blinded, circumstances under which unblinding is permissible, and procedure for revealing a participant's \_\_\_\_\_ 7 \_\_\_\_\_  
 28 allocated intervention during the trial  
 29  
 30

31 **Methods: Data collection, management, and analysis**

32  
 33 Data collection 18a Plans for assessment and collection of outcome, baseline, and other trial data, including any related \_\_\_\_\_ 7-8 \_\_\_\_\_  
 34 methods processes to promote data quality (eg, duplicate measurements, training of assessors) and a description of  
 35 study instruments (eg, questionnaires, laboratory tests) along with their reliability and validity, if known.  
 36 Reference to where data collection forms can be found, if not in the protocol  
 37

38  
 39 18b Plans to promote participant retention and complete follow-up, including list of any outcome data to be \_\_\_\_\_ 6 \_\_\_\_\_  
 40 collected for participants who discontinue or deviate from intervention protocols  
 41  
 42

|    |                                 |     |                                                                                                                                                                                                                                                                                                                                       |               |
|----|---------------------------------|-----|---------------------------------------------------------------------------------------------------------------------------------------------------------------------------------------------------------------------------------------------------------------------------------------------------------------------------------------|---------------|
| 1  | Data management                 | 19  | Plans for data entry, coding, security, and storage, including any related processes to promote data quality (eg, double data entry; range checks for data values). Reference to where details of data management procedures can be found, if not in the protocol                                                                     | _____5_____   |
| 2  |                                 |     |                                                                                                                                                                                                                                                                                                                                       |               |
| 3  |                                 |     |                                                                                                                                                                                                                                                                                                                                       |               |
| 4  |                                 |     |                                                                                                                                                                                                                                                                                                                                       |               |
| 5  | Statistical methods             | 20a | Statistical methods for analysing primary and secondary outcomes. Reference to where other details of the statistical analysis plan can be found, if not in the protocol                                                                                                                                                              | ___9-10_____  |
| 6  |                                 |     |                                                                                                                                                                                                                                                                                                                                       |               |
| 7  |                                 |     |                                                                                                                                                                                                                                                                                                                                       |               |
| 8  |                                 | 20b | Methods for any additional analyses (eg, subgroup and adjusted analyses)                                                                                                                                                                                                                                                              | ___9-10_____  |
| 9  |                                 |     |                                                                                                                                                                                                                                                                                                                                       |               |
| 10 |                                 | 20c | Definition of analysis population relating to protocol non-adherence (eg, as randomised analysis), and any statistical methods to handle missing data (eg, multiple imputation)                                                                                                                                                       | ___10_____    |
| 11 |                                 |     |                                                                                                                                                                                                                                                                                                                                       |               |
| 12 |                                 |     |                                                                                                                                                                                                                                                                                                                                       |               |
| 13 |                                 |     |                                                                                                                                                                                                                                                                                                                                       |               |
| 14 | <b>Methods: Monitoring</b>      |     |                                                                                                                                                                                                                                                                                                                                       |               |
| 15 |                                 |     |                                                                                                                                                                                                                                                                                                                                       |               |
| 16 | Data monitoring                 | 21a | Composition of data monitoring committee (DMC); summary of its role and reporting structure; statement of whether it is independent from the sponsor and competing interests; and reference to where further details about its charter can be found, if not in the protocol. Alternatively, an explanation of why a DMC is not needed | ___10_____    |
| 17 |                                 |     |                                                                                                                                                                                                                                                                                                                                       |               |
| 18 |                                 |     |                                                                                                                                                                                                                                                                                                                                       |               |
| 19 |                                 |     |                                                                                                                                                                                                                                                                                                                                       |               |
| 20 |                                 |     |                                                                                                                                                                                                                                                                                                                                       |               |
| 21 |                                 |     |                                                                                                                                                                                                                                                                                                                                       |               |
| 22 |                                 | 21b | Description of any interim analyses and stopping guidelines, including who will have access to these interim results and make the final decision to terminate the trial                                                                                                                                                               | ___6, 11_____ |
| 23 |                                 |     |                                                                                                                                                                                                                                                                                                                                       |               |
| 24 |                                 |     |                                                                                                                                                                                                                                                                                                                                       |               |
| 25 | Harms                           | 22  | Plans for collecting, assessing, reporting, and managing solicited and spontaneously reported adverse events and other unintended effects of trial interventions or trial conduct                                                                                                                                                     | ___11_____    |
| 26 |                                 |     |                                                                                                                                                                                                                                                                                                                                       |               |
| 27 |                                 |     |                                                                                                                                                                                                                                                                                                                                       |               |
| 28 | Auditing                        | 23  | Frequency and procedures for auditing trial conduct, if any, and whether the process will be independent from investigators and the sponsor                                                                                                                                                                                           | ___10_____    |
| 29 |                                 |     |                                                                                                                                                                                                                                                                                                                                       |               |
| 30 |                                 |     |                                                                                                                                                                                                                                                                                                                                       |               |
| 31 |                                 |     |                                                                                                                                                                                                                                                                                                                                       |               |
| 32 | <b>Ethics and dissemination</b> |     |                                                                                                                                                                                                                                                                                                                                       |               |
| 33 |                                 |     |                                                                                                                                                                                                                                                                                                                                       |               |
| 34 | Research ethics approval        | 24  | Plans for seeking research ethics committee/institutional review board (REC/IRB) approval                                                                                                                                                                                                                                             | ___10_____    |
| 35 |                                 |     |                                                                                                                                                                                                                                                                                                                                       |               |
| 36 |                                 |     |                                                                                                                                                                                                                                                                                                                                       |               |
| 37 | Protocol amendments             | 25  | Plans for communicating important protocol modifications (eg, changes to eligibility criteria, outcomes, analyses) to relevant parties (eg, investigators, REC/IRBs, trial participants, trial registries, journals, regulators)                                                                                                      | ___10_____    |
| 38 |                                 |     |                                                                                                                                                                                                                                                                                                                                       |               |
| 39 |                                 |     |                                                                                                                                                                                                                                                                                                                                       |               |
| 40 |                                 |     |                                                                                                                                                                                                                                                                                                                                       |               |
| 41 |                                 |     |                                                                                                                                                                                                                                                                                                                                       |               |
| 42 |                                 |     |                                                                                                                                                                                                                                                                                                                                       |               |
| 43 |                                 |     |                                                                                                                                                                                                                                                                                                                                       |               |
| 44 |                                 |     |                                                                                                                                                                                                                                                                                                                                       |               |
| 45 |                                 |     |                                                                                                                                                                                                                                                                                                                                       |               |
| 46 |                                 |     |                                                                                                                                                                                                                                                                                                                                       |               |



|    |                               |     |                                                                                                                                                                                                                                                                                     |              |
|----|-------------------------------|-----|-------------------------------------------------------------------------------------------------------------------------------------------------------------------------------------------------------------------------------------------------------------------------------------|--------------|
| 1  | Consent or assent             | 26a | Who will obtain informed consent or assent from potential trial participants or authorised surrogates, and how (see Item 32)                                                                                                                                                        | _____7_____  |
| 2  |                               |     |                                                                                                                                                                                                                                                                                     |              |
| 3  |                               |     |                                                                                                                                                                                                                                                                                     |              |
| 4  |                               | 26b | Additional consent provisions for collection and use of participant data and biological specimens in ancillary studies, if applicable                                                                                                                                               | _____        |
| 5  |                               |     |                                                                                                                                                                                                                                                                                     |              |
| 6  |                               |     |                                                                                                                                                                                                                                                                                     |              |
| 7  | Confidentiality               | 27  | How personal information about potential and enrolled participants will be collected, shared, and maintained in order to protect confidentiality before, during, and after the trial                                                                                                | _____5_____  |
| 8  |                               |     |                                                                                                                                                                                                                                                                                     |              |
| 9  |                               |     |                                                                                                                                                                                                                                                                                     |              |
| 10 | Declaration of interests      | 28  | Financial and other competing interests for principal investigators for the overall trial and each study site                                                                                                                                                                       | _____15_____ |
| 11 |                               |     |                                                                                                                                                                                                                                                                                     |              |
| 12 |                               |     |                                                                                                                                                                                                                                                                                     |              |
| 13 | Access to data                | 29  | Statement of who will have access to the final trial dataset, and disclosure of contractual agreements that limit such access for investigators                                                                                                                                     | _____5_____  |
| 14 |                               |     |                                                                                                                                                                                                                                                                                     |              |
| 15 |                               |     |                                                                                                                                                                                                                                                                                     |              |
| 16 | Ancillary and post-trial care | 30  | Provisions, if any, for ancillary and post-trial care, and for compensation to those who suffer harm from trial participation                                                                                                                                                       | _____        |
| 17 |                               |     |                                                                                                                                                                                                                                                                                     |              |
| 18 |                               |     |                                                                                                                                                                                                                                                                                     |              |
| 19 |                               |     |                                                                                                                                                                                                                                                                                     |              |
| 20 | Dissemination policy          | 31a | Plans for investigators and sponsor to communicate trial results to participants, healthcare professionals, the public, and other relevant groups (eg, via publication, reporting in results databases, or other data sharing arrangements), including any publication restrictions | _____10_____ |
| 21 |                               |     |                                                                                                                                                                                                                                                                                     |              |
| 22 |                               |     |                                                                                                                                                                                                                                                                                     |              |
| 23 |                               |     |                                                                                                                                                                                                                                                                                     |              |
| 24 |                               | 31b | Authorship eligibility guidelines and any intended use of professional writers                                                                                                                                                                                                      | _____        |
| 25 |                               |     |                                                                                                                                                                                                                                                                                     |              |
| 26 |                               | 31c | Plans, if any, for granting public access to the full protocol, participant-level dataset, and statistical code                                                                                                                                                                     | _____        |
| 27 |                               |     |                                                                                                                                                                                                                                                                                     |              |
| 28 |                               |     |                                                                                                                                                                                                                                                                                     |              |
| 29 | <b>Appendices</b>             |     |                                                                                                                                                                                                                                                                                     |              |
| 30 |                               |     |                                                                                                                                                                                                                                                                                     |              |
| 31 | Informed consent materials    | 32  | Model consent form and other related documentation given to participants and authorised surrogates                                                                                                                                                                                  | _____        |
| 32 |                               |     |                                                                                                                                                                                                                                                                                     |              |
| 33 |                               |     |                                                                                                                                                                                                                                                                                     |              |
| 34 | Biological specimens          | 33  | Plans for collection, laboratory evaluation, and storage of biological specimens for genetic or molecular analysis in the current trial and for future use in ancillary studies, if applicable                                                                                      | _____        |
| 35 |                               |     |                                                                                                                                                                                                                                                                                     |              |
| 36 |                               |     |                                                                                                                                                                                                                                                                                     |              |

37 \*It is strongly recommended that this checklist be read in conjunction with the SPIRIT 2013 Explanation & Elaboration for important clarification on the items.  
 38 Amendments to the protocol should be tracked and dated. The SPIRIT checklist is copyrighted by the SPIRIT Group under the Creative Commons  
 39 "[Attribution-NonCommercial-NoDerivs 3.0 Unported](https://creativecommons.org/licenses/by-nc-nd/3.0/)" license.  
 40  
 41  
 42

# BMJ Open

## Randomized double-blind phase 3 clinical study testing impact of atorvastatin on prostate cancer progression after initiation of androgen deprivation therapy - study protocol

|                                 |                                                                                                                                                                                                                                                                                                                                                                                                                                                                                                                                                                                                                                                                                                                                                                                                                                                                                                                                                                                                                                                                                                                                                                                                                                                                                                                                                                                                                                                  |
|---------------------------------|--------------------------------------------------------------------------------------------------------------------------------------------------------------------------------------------------------------------------------------------------------------------------------------------------------------------------------------------------------------------------------------------------------------------------------------------------------------------------------------------------------------------------------------------------------------------------------------------------------------------------------------------------------------------------------------------------------------------------------------------------------------------------------------------------------------------------------------------------------------------------------------------------------------------------------------------------------------------------------------------------------------------------------------------------------------------------------------------------------------------------------------------------------------------------------------------------------------------------------------------------------------------------------------------------------------------------------------------------------------------------------------------------------------------------------------------------|
| Journal:                        | <i>BMJ Open</i>                                                                                                                                                                                                                                                                                                                                                                                                                                                                                                                                                                                                                                                                                                                                                                                                                                                                                                                                                                                                                                                                                                                                                                                                                                                                                                                                                                                                                                  |
| Manuscript ID                   | bmjopen-2021-050264.R1                                                                                                                                                                                                                                                                                                                                                                                                                                                                                                                                                                                                                                                                                                                                                                                                                                                                                                                                                                                                                                                                                                                                                                                                                                                                                                                                                                                                                           |
| Article Type:                   | Protocol                                                                                                                                                                                                                                                                                                                                                                                                                                                                                                                                                                                                                                                                                                                                                                                                                                                                                                                                                                                                                                                                                                                                                                                                                                                                                                                                                                                                                                         |
| Date Submitted by the Author:   | 16-Dec-2021                                                                                                                                                                                                                                                                                                                                                                                                                                                                                                                                                                                                                                                                                                                                                                                                                                                                                                                                                                                                                                                                                                                                                                                                                                                                                                                                                                                                                                      |
| Complete List of Authors:       | Siltari, Aino; Tampere University, Faculty of Medicine and Health Technology; University of Helsinki, Faculty of Medicine, Pharmacology<br>Riikonen, Jarno; Tampere University Hospital, Department of Urology<br>Koskimäki, Juha; Tampere University Hospital, Department of Urology<br>Pakarainen, Tomi; Tampere University Hospital, Department of Urology<br>Ettala, Otto; University of Turku<br>Boström, Peter; University of Turku<br>Seikkula, Heikki; Central Finland Central Hospital<br>Kotsar, Andres; Tartu University Hospital<br>Tammela, Teuvo; University of Tampere<br>Helminen, Mika; Tampere University, Health Sciences<br>Raittinen, Paavo; Aalto University School of Science and Technology, Department of Mathematics and Systems Analysis<br>Lehtimäki, Terho; Tampere University, Department of Clinical Chemistry<br>Fode, Mikkel; Herlev Hospital<br>Østergren, Peter; Herlev and Gentofte University Hospital, Department of Urology<br>Borre, Michael; Aarhus Universitetshospital, Department of Urology<br>Rannikko, Antti; Helsinki University and Helsinki University Hospital, Department of Urology<br>Marttila, Timo; Seinäjoki Central Hospital, Department of Urology<br>Salonen, Arto; Kuopio University Hospital<br>Ronkainen, Hanna; Oulu University Hospital<br>Löffeler, Sven; Vestfold Hospital Trust, Section of Urology<br>Murtola, Teemu J ; Tampere University Hospital, Department of Urology |
| <b>Primary Subject Heading</b>: | Urology                                                                                                                                                                                                                                                                                                                                                                                                                                                                                                                                                                                                                                                                                                                                                                                                                                                                                                                                                                                                                                                                                                                                                                                                                                                                                                                                                                                                                                          |
| Secondary Subject Heading:      | Oncology                                                                                                                                                                                                                                                                                                                                                                                                                                                                                                                                                                                                                                                                                                                                                                                                                                                                                                                                                                                                                                                                                                                                                                                                                                                                                                                                                                                                                                         |
| Keywords:                       | Prostate disease < UROLOGY, Clinical trials < THERAPEUTICS, Urological tumours < ONCOLOGY                                                                                                                                                                                                                                                                                                                                                                                                                                                                                                                                                                                                                                                                                                                                                                                                                                                                                                                                                                                                                                                                                                                                                                                                                                                                                                                                                        |
|                                 |                                                                                                                                                                                                                                                                                                                                                                                                                                                                                                                                                                                                                                                                                                                                                                                                                                                                                                                                                                                                                                                                                                                                                                                                                                                                                                                                                                                                                                                  |

1  
2  
3  
4  
5  
6  
7  
8  
9  
10  
11  
12  
13  
14  
15  
16  
17  
18  
19  
20  
21  
22  
23  
24  
25  
26  
27  
28  
29  
30  
31  
32  
33  
34  
35  
36  
37  
38  
39  
40  
41  
42  
43  
44  
45  
46  
47  
48  
49  
50  
51  
52  
53  
54  
55  
56  
57  
58  
59  
60

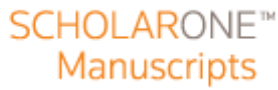

# 1 2 3 **1 Randomized double-blind phase 3 clinical study testing impact of** 4 **2 atorvastatin on prostate cancer progression after initiation of androgen** 5 **3 deprivation therapy - study protocol** 6 7 8 9

10  
11 4 Aino Siltari<sup>1</sup>, Jarno Riikonen<sup>2</sup>, Juha Koskimäki<sup>2</sup>, Tomi Pakarainen<sup>2</sup>, Otto Ettala<sup>3</sup>, Peter Boström<sup>3</sup>,  
12 5 Heikki Seikkula<sup>4</sup>, Andres Kotsar<sup>5</sup>, Teuvo LJ Tammela<sup>1,2</sup>, Mika Helminen<sup>7,8</sup>, Paavo V Raittinen<sup>9</sup>,  
13 6 Terho Lehtimäki<sup>1,10</sup>, Mikkel Fode<sup>11</sup>, Peter Østergren<sup>11</sup>, Michael Borre<sup>12</sup>, Antti Rannikko<sup>13</sup>, Timo  
14 7 Marttila<sup>14</sup>, Arto Salonen<sup>15</sup>, Hanna Ronkainen<sup>16</sup>, Sven Löffeler<sup>17</sup>, Teemu J Murtola<sup>1,2\*</sup>  
15  
16  
17  
18

19 8 <sup>1</sup>Tampere University, Faculty of Medicine and Health Technology, Tampere, Finland, <sup>2</sup>TAYS Cancer  
20 9 Center, Department of Urology, Tampere, Finland, <sup>3</sup>Turku University Hospital and University of  
21 10 Turku, Turku, Finland, <sup>4</sup>Central Finland Central Hospital, Jyväskylä, Finland, <sup>5</sup>Tartu University  
22 11 Hospital, Department of Urology, Tartu, Estonia, <sup>6</sup>Fimlab laboratories, Department of Pathology,  
23 12 Tampere, Finland, <sup>7</sup>Tampere University Hospital, Research Services, Tampere, Finland, <sup>8</sup>Tampere  
24 13 University, Faculty of Social Sciences, Health Sciences, Tampere Finland, <sup>9</sup>Aalto University School  
25 14 of Science, Department of Mathematics and Systems Analysis, Espoo, Finland, <sup>10</sup>Fimlab  
26 15 Laboratories, Department of Clinical Chemistry, Tampere, Finland, <sup>11</sup>Department of Urology, Herlev  
27 16 and Gentofte Hospital, Denmark, <sup>12</sup>Aarhus University Hospital, Department of Urology, Aarhus,  
28 17 Denmark, <sup>13</sup>Helsinki University and Helsinki University Hospital, Department of Urology, Helsinki,  
29 18 Finland <sup>14</sup>Seinäjoki Central Hospital, Department of Urology, Seinäjoki, Finland, <sup>15</sup>Kuopio  
30 19 University Hospital, Department of Urology, Kuopio, Finland, <sup>16</sup>Oulu University Hospital,  
31 20 Department of Urology, Oulu, Finland, <sup>17</sup> Vestfold Hospital Trust, Section of Urology, Tønsberg,  
32 21 Norway  
33  
34  
35  
36  
37  
38  
39  
40  
41  
42  
43

44 22 \*corresponding author: Teemu J Murtola, Department of Urology, Tampere University Hospital, PL  
45 23 2000, 33521 Tampere, Finland, teemu.murtola@tuni.fi, telephone: +358 (0) 294 52 11.  
46  
47  
48  
49  
50  
51  
52

53 27 Keywords: Prostate cancer; castration-resistant prostate cancer; androgen deprivation therapy;  
54 28 atorvastatin; randomized clinical trial  
55  
56  
57

58 30 Word count: 4069 (excluding title page, references, figures, and tables)  
59  
60 31

## 1 Abstract

### 2 Introduction

3 Blood cholesterol is likely a risk factor for prostate cancer prognosis and use of statins is associated  
4 with lowered risk of prostate cancer recurrence and progression. Furthermore, use of statins has been  
5 associated with prolonged time before development of castration resistance (CR) during androgen  
6 deprivation therapy (ADT) for prostate cancer. However, the efficacy of statins on delaying  
7 castration-resistance has not been tested in a randomized placebo-controlled setting.

8 This study aims to test statins' efficacy compared to placebo in delaying development of CR during  
9 ADT treatment for primary metastatic or recurrent prostate cancer. Secondary aim is to explore effect  
10 of statin intervention on prostate cancer mortality and lipid metabolism during ADT.

### 11 Methods and analysis

12  
13 In this randomized placebo-controlled trial, a total of 400 men with *de novo* metastatic prostate cancer  
14 or recurrent disease after primary treatment and starting ADT will be recruited and randomized 1:1  
15 to use daily 80 mg of atorvastatin or placebo. All researchers, study nurses, and patients will be  
16 blinded throughout the trial. Patients are followed until disease recurrence or death. Primary outcome  
17 is time to formation of CR after initiation of ADT. Serum lipid levels (total cholesterol, HDL, LDL,  
18 and triglycerides) are analyzed to test whether changes in serum cholesterol parameters during ADT  
19 predict length of treatment response. Furthermore, the trial will compare quality of life,  
20 cardiovascular morbidity, changes in blood glucose and circulating cell-free DNA, and urine lipids  
21 during trial.

### 22 Ethics and dissemination

23 This study is approved by the Regional ethics committees of the Pirkanmaa Hospital District, Science  
24 center, Tampere, Finland (R18065M) and Tarto University Hospital, Tarto, Estonia (319/T-6). All  
25 participants read and sign informed consent form before study entry. Clinicaltrial.gov:  
26 NCT04026230, Eudra-CT: 2016-004774-17, protocol code: ESTO2, protocol date September 10<sup>th</sup>  
27 2020 and version 6. After publication of results for the primary endpoints, anonymized summary  
28 metadata and statistical code will be made openly available. The data will not include any information  
29 that could make it possible to identify a given participant.

1  
2  
3 1 Keywords: Prostate cancer; castration-resistant prostate cancer; androgen deprivation therapy;  
4 atorvastatin; randomized clinical trial  
5 2  
6 3  
7  
8

9 4 Strengths and limitations of this study  
10  
11

- 12 5 • First randomized placebo-controlled phase 3 clinical study on effects of atorvastatin on  
13 prostate cancer progression during ADT treatment
- 14 6 • Multicenter study in Finland, Denmark, Estonia, and Norway
- 15 7 • As a limiting factor, only minority of prostate cancer cases are advanced and large proportion  
16 8 of potential participants are ineligible due to using statins already. Thus, study enrolment will  
17 9 take several years  
18 10  
19 11  
20 12  
21 13  
22 14  
23 15  
24 16  
25 17

## 26 13 Introduction

27  
28  
29 14 Prostate cancer (PCa) is the most common cancer in Finnish men and a major public health burden  
30 15 causing annually around 900 cancer deaths in Finland and the yearly costs caused by the disease are  
31 16 estimated to reach 180 million euros.<sup>1-2</sup> However, not all prostatic malignancies are lethal; only 10-  
32 17 20% of tumors advance to metastases and eventually into a fatal stage. Advanced PCa is treated by  
33 18 androgen deprivation therapy (ADT). Eventually, however, PCa progress despite the ADT treatment  
34 19 and forms state called castration resistance. Thus, castration resistance is clinically defined as a  
35 20 moment when prostate cancer no longer responds to ADT treatment. Median time to castration  
36 21 resistance is 12-15 months and 45 months to death in patients who have started ADT for metastatic  
37 22 prostate cancer.<sup>3-7</sup> In men who start ADT for disease recurrence after primary treatment, median  
38 23 failure-free survival time is 33 months and 70 months to death.<sup>3</sup>  
39  
40  
41  
42  
43  
44  
45  
46  
47  
48

49 25 Blood cholesterol is likely a risk factor for prostate cancer prognosis; risk of disease recurrence after  
50 26 primary treatment is significantly elevated in men with hypercholesterolemia.<sup>8</sup> Laboratory studies  
51 27 have demonstrated the importance of cholesterol for prostate cancer cell growth.<sup>9,10</sup> Furthermore,  
52 28 upregulation of intracellular lipid production and ensuing lipid accumulation is essential in surviving  
53 29 hypoxic tumor microenvironment.<sup>11</sup> In prostate cancer cells it also assists in evading host-tumor  
54 30 immune response.<sup>12</sup> Also, upregulation of intracellular cholesterol production appears to be central  
55 31 for development of castration resistance.<sup>13</sup>  
56  
57  
58  
59  
60

1  
2  
3  
4  
5  
6  
7  
8  
9  
10  
11  
12  
13  
14  
15  
16  
17  
18  
19  
20  
21  
22  
23  
24  
25  
26  
27  
28  
29  
30  
31  
32  
33  
34  
35  
36  
37  
38  
39  
40  
41  
42  
43  
44  
45  
46  
47  
48  
49  
50  
51  
52  
53  
54  
55  
56  
57  
58  
59  
60

1 Lipid metabolism is emerging as a new risk factor for prostate cancer progression. The role of  
2 cholesterol is important in development of castration resistance, and inhibition of intracellular lipid  
3 production interferes with androgen receptor (AR) signaling essential for prostate cancer  
4 progression<sup>13-15</sup>. Cholesterol is precursor for intracellular androgen production, a central mechanism  
5 for prostate cancer cells to overcome ADT.<sup>13,15</sup> A recent study suggests that some of the serum basic  
6 lipid parameters may have increased association with development of castration resistance and  
7 metastasis especially in statin-naïve patients.<sup>16</sup> Clarification of the role of lipid metabolism during  
8 ADT will likely provide new tools for control of disease progression and prostate cancer treatment.

9 Use of cholesterol-lowering statin drugs is associated with lowered risk of prostate cancer recurrence  
10 and progression; risk of prostate cancer death is reduced by 30% compared to the non-users.<sup>14,17,18</sup>  
11 The anticancer effect may be specifically against progression of the disease and the mechanisms  
12 driving it.<sup>19</sup> Statins inhibit the cholesterol-synthesizing mevalonate pathway, which is active in  
13 prostate cancer cells.<sup>10,20</sup> Besides cholesterol, this pathway also produces isoprenoid proteins which  
14 are critical for regulation of cell growth and other central cellular control processes.<sup>20</sup> Furthermore,  
15 steroid hormones such as testosterone are metabolized from cholesterol, thus statins appear to target  
16 androgen metabolism, another crucial pathway for prostate cancer growth.<sup>21,22</sup>

17 Statin use has been reported to prolong efficacy of ADT in prostate cancer as it has been reported to  
18 prolong the efficacy of ADT for 8-10 months.<sup>23,24</sup> Furthermore, statins have been linked to a  
19 prolonged response to androgen-signaling targeted drugs abiraterone and enzalutamide used in  
20 management of castration-resistant disease.<sup>25,26</sup>

21 Statins have not been found to affect prostate cancer mortality in trials testing their efficacy in  
22 secondary prevention of cardiovascular disease.<sup>27</sup> However, in these trials cancer was often an  
23 exclusion criterion. On the other hand, it may be that statin treatment has more impact on hormone-  
24 dependent cancers which are underrepresented in these studies. In a randomized clinical trial focusing  
25 on prostate cancer patients 80 mg of atorvastatin has been found to reduce tumor proliferation activity  
26 compared to placebo after minimum exposure of 21 days.<sup>28</sup> Similar results were seen after treatment  
27 with fluvastatin, although in a non-randomized and uncontrolled setting.<sup>29</sup> Nevertheless, clinical  
28 efficacy of statins in preventing progression of prostate cancer has not been tested in a randomized  
29 placebo-controlled setting. Also, a recent post-hoc study of randomized clinical trial concluded that  
30 statin use was associated with decreased overall and PCa-specific mortality in men with ADT.<sup>30</sup>  
31 Therefore, it is important to do a trial testing effects of statins specifically in prostate cancer patients.

## 1 **Study objective**

2 Primary objective for this phase III randomized double-blind placebo-controlled trial is to explore  
3 whether intervention with atorvastatin delays prostate cancer progression i.e. development of  
4 castration resistance compared to placebo during androgen deprivation therapy (ADT) for metastatic  
5 or recurrent prostate cancer. Secondary objectives include exploring whether atorvastatin lowers  
6 prostate cancer-specific or overall mortality compared to placebo, and to demonstrate whether  
7 changes in serum lipid parameters predict disease recurrence and occurrence of adverse tumor  
8 genomic traits predicting castration resistance among prostate cancer patients during ADT.

## 9 **Methods and analysis**

### 10 **Study setting**

11 Study flow, study settings, and other information are presented in Figure 1 and Table 1. The study  
12 recruitment target is 400 participants who start ADT as primary management of *de novo* metastatic  
13 prostate cancer or as secondary management for prostate cancer recurrence after localized treatment.  
14 Participants can be high-risk M0 or M1 stage, main inclusion criterion is that long-term ADT  
15 treatment is started. These men will be randomized 1:1 (200 + 200) to receive either 80 mg of  
16 atorvastatin daily or placebo until disease recurrence i.e. development of castration resistance, death,  
17 or maximum of ten years. Sample size is based on a power calculation from a previous retrospective  
18 study.<sup>23</sup>

19 The study will be carried out in collaboration between urological departments of University Hospitals  
20 and central hospitals in Finland, the Herlev University Hospital in Denmark, the Tartu University  
21 Hospital in Estonia, and Vestfold Hospital Trust in Norway (Table 1).

22 Study data are collected and managed using REDCap electronic data capture tools hosted at Tampere  
23 University.<sup>31,32</sup> Only the primary investigators, study nurses, and registered study co-investigator  
24 from each participating site will have access to the platform. All laboratory results, symptoms, and  
25 results from imaging studies done at the discretion of the attending clinicians are recorded in the  
26 database. All clinical decisions besides the study drug, e.g. use of early chemotherapy, abiraterone,  
27 or other drugs in adjunct with ADT will be up to the discretion of the attending clinician and allowed  
28 but will also be recorded in the REDCap database.

29 Follow-up is continued until development of castration resistance, death, or maximum of 10 years.  
30 Participants are given the opportunity to carry on with the intervention even after development of



1  
2  
3 1 castration resistance to observe effects on survival. Unblinding will be performed after recruitment  
4 target has been reached and all participants have been followed for minimum of 12 months.  
5 2  
6 3

8 4 Castration resistance is defined as either PSA progression (three consecutive rises of PSA measured  
9 at least 1 week apart with two > 50% increases over the nadir and PSA > 2 ng/ml) or radiological  
10 5 progression (appearance of two or more lesions in bone scan or soft tissue enlargement as per RECIST  
11 6 criteria) while serum testosterone is at the castrate level (< 50 ng/ml or 1.7 nmol/l).  
12 7  
13  
14  
15

16 8 For men who initiate statin use during the study period for clinical indications, the study drug is  
17 9 dropped but the study follow-up is continued. These men will be included in the final analysis  
18 10 according to the intention-to-treat principle within their allocated study arm.  
19  
20  
21

22 11 In case of intolerable side-effects as judged by either the participant or the attending physician, the  
23 12 study drug is stopped, and these men will be analyzed according to the intention-to-treat principle.  
24  
25  
26

27 13 Participants who discontinue follow-up or deviate from the study protocol for any reason will be  
28 14 given the chance to remain or return to follow-up to allow intention-to-treat analyses.  
29  
30

### 31 15 **Inclusion and exclusion criteria**

32  
33  
34 16 Inclusion criteria for participants are histopathologically confirmed metastatic adenocarcinoma of the  
35 17 prostate or high-risk M0 stage recurrent prostate cancer for which androgen deprivation or  
36 18 antiandrogen therapy is initiated no longer than 3 months before recruitment, willingness to  
37 19 participate, and signing of informed consent (Figure 1).  
38  
39  
40  
41

42 20 Exclusion criteria for participants are regular statin use at the time of recruitment or within 6 months  
43 21 of it, previous adverse effects during statin therapy, familial hypercholesterolemia or very high total  
44 22 cholesterol (9.3 mmol/l or above), clinically significant renal (serum creatinine above 170  $\mu$ mol/l) or  
45 23 liver insufficiency (serum alanine aminotransferase more than two times above the upper limit of  
46 24 normal range), and use of drugs that may interact with statins (St John's Wort, HIV protease  
47 25 inhibitors, ciclosporin, macrolide antibiotics, fucidic acid, phenytoin, carbamazepine, dronedarone,  
48 26 or oral antifungal medication) (Figure 1).  
49  
50  
51  
52  
53  
54

### 55 27 **Study endpoints**

56  
57  
58 28 Primary endpoint is the time to disease progression after starting ADT/antiandrogen therapy.  
59 29 Secondary endpoints are 1); prostate cancer-specific mortality and overall survival, 2); change in  
60

1  
2  
3 1 serum cholesterol during the intervention and its role in predicting time to disease recurrence in the  
4 placebo arm, 3); occurrence of adverse tumor traits predicting development of castration resistance  
5 2 in circulating cell free DNA, 4); changes in fasting blood glucose during ADT, 5); occurrence of  
6 3 cardiovascular events during ADT, and 6); Quality of life (QoL) during ADT.  
7  
8  
9

## 10 5 **Study flow**

11  
12  
13  
14 6 Study flow and schedule is presented in Figure 1 and Table 2. Patients are recruited at urology  
15 7 outpatient clinic at urologists' visits. If the inclusion criteria are met and the exclusion criteria are not  
16 8 and the participant signs informed consent form, he is given a study number (ranging between E-001  
17 9 to E-400) and he receives either 80 mg atorvastatin or placebo according to the study arm randomly  
18 10 allocated for the study number. No blocking or other restrictions will be implemented for  
19 11 randomization. Only the national study coordinator in each country will be able to see which study  
20 12 arm the participant has been randomized to. The participant will then receive first dose of the  
21 13 respective study drug randomized to his study number. The drug boxes and capsules containing  
22 14 atorvastatin and placebo will be identical in appearance. All researchers, nurses, and study  
23 15 participants will remain blinded to the allocation sequence until termination of the study and closure  
24 16 of the study data.  
25  
26  
27  
28  
29  
30  
31  
32

33  
34 17 Control visits are scheduled at 6-month intervals to suit common clinical practice. Control visits are  
35 18 done by a clinician, complemented with measurements done by a research nurse. For each control  
36 19 visit the participant returns remaining capsules from the previously delivered ration and will receive  
37 20 a new one according to his study number. Number of the remaining capsules will be counted and  
38 21 saved in the REDCap, trial database, to monitor compliance. In every visit serum PSA (ng/ml), lipid  
39 22 levels (total cholesterol, HDL, LDL, and triglycerides, mmol/l), alkaline phosphatase (U/l), creatinine  
40 23 ( $\mu\text{mol/l}$ ), and fasting glucose (mmol/l) will be measured (Table 2) and the participant is asked about  
41 24 symptoms that are suggestive of metastases and about possible adverse effects of the study drug.  
42 25 Serum creatine kinase (U/l) and alanine aminotransferase (U/l) is also measured at each visit.  
43  
44  
45  
46  
47  
48  
49

50 26 Blood samples are taken and stored at 6-month intervals to monitor changes in tumor markers and  
51 27 occurrence of adverse tumor characteristics after initiation of ADT. Quality of life during the  
52 28 intervention will be charted once a year using validated WHOQOL-BREF quality of life  
53 29 questionnaire.<sup>33</sup>  
54  
55  
56  
57

58 30 Follow-up is continued until development of castration resistance, drop out from the study, death, or  
59 31 maximum of ten years. Participants developing castration resistance are given an opportunity to carry

1  
2  
3  
4  
5  
6  
7  
8  
9  
10  
11  
12  
13  
14  
15  
16  
17  
18  
19  
20  
21  
22  
23  
24  
25  
26  
27  
28  
29  
30  
31  
32  
33  
34  
35  
36  
37  
38  
39  
40  
41  
42  
43  
44  
45  
46  
47  
48  
49  
50  
51  
52  
53  
54  
55  
56  
57  
58  
59  
60

1 on with their assigned treatment as statins have been linked to longer cancer-specific survival.  
2 Unblinding will be performed after recruitment target has been reached and all participants have been  
3 followed for minimum of 12 months.

4 Prostate cancer treatment apart from the study drug will be up to the discretion of the attending  
5 clinician. All laboratory results, symptoms, and possible imaging results will be recorded in the  
6 REDCap database. All clinical decisions regarding early chemotherapy and imaging will be made on  
7 the discretion of the clinician and recorded in the REDCap database.

### 8 **Stored blood samples**

9 Separate whole blood (for RNA and DNA isolation), plasma, and serum samples are taken at each  
10 control visit at 6-month intervals and stored for mass-spectrometric and nuclear magnetic resonance  
11 (NMR)-based determination of serum lipidome. These samples will also be used for RNA and whole  
12 genome sequencing of mutations and genetic modifications predicting disease recurrence and  
13 metastasis, such as BRCA1/2, ERG, MYC, TP53, ATM, PTEN, and AR splice variants.<sup>34,35</sup> Also  
14 hypoxia markers will be measured.<sup>36</sup>

15 For participants with confirmed metastases in the bone or soft tissues, amount of cell free DNA from  
16 the plasma will be measured before ADT initiation and again at castration resistance development for  
17 sequencing and detection of genetic modifications predicting metastases.<sup>34,35</sup> Selected patients are  
18 also imaged with positron emission tomography (PET) scan using 18F-2-  
19 nitroimidazolpentafluoropropylacetamide (EF5)<sup>37</sup> to monitor hypoxia and FDG-PET to evaluate  
20 immune responses<sup>38</sup> in the primary tumor and the metastases during the atorvastatin intervention.

### 21 **Sample size calculation**

22 In a cohort study by Harshman et al.<sup>23</sup>, among men starting ADT, 58% of the statin users and 75% of  
23 non-users of statins progress to castration resistance during median 5.8 years. We used these crude  
24 percentages for sample size calculations.

25 With alpha and beta values of 0.05 and 0.20 (power=0.80), sample size of 400 men will be enough  
26 to detect a risk difference with HR 0.65 (Figure 2). We assume 10% drop-out rate in each study arm.  
27 The program “PS - Power and sample size, version 3.1.2” was used for the calculation.

28 The median time to disease progression is assumed to be 12-15 months for patients with *de novo*  
29 metastatic disease and 33 months for patients recurring after primary therapy.<sup>3-7</sup> Therefore, the

1  
2  
3 1 intervention will continue until castration resistance, death, or for maximum of 10 years. Post hoc  
4  
5 2 follow-up will continue after the intervention. A 3 months' difference in time to castration resistance  
6  
7 3 between the study arms will be considered clinically significant.  
8

9 4 It has to be noted that the number of studies published on this topic is low and, in the absence of  
10  
11 5 randomized evidence on this topic, the power calculation is based on results of epidemiological study  
12  
13 6 prone to residual bias. Therefore, an interim analysis will be performed after the first 100 participants  
14  
15 7 have met the primary endpoint, i.e. progressed into castration resistance. Without lifting the blinding,  
16  
17 8 the power calculations are repeated to verify whether the chosen sample size has adequate statistical  
18  
19 9 power to detect statistically significant difference of the effect size observed between the  
20  
21 10 randomization groups at that time. If the calculations suggest that a larger sample size is needed for  
22  
23 11 the trial, the study protocol will be amended with updated recruitment target.

## 24 12 **Statistical methods**

25  
26  
27 13 Distribution balance of prostate cancer clinical characteristics such as TNM stage at diagnosis,  
28  
29 14 Gleason score, and PSA at time of diagnosis will be presented in a patient characteristics table,  
30  
31 15 stratified by study arms. Categorical variables are displayed as absolute count frequencies and relative  
32  
33 16 frequencies, i.e., proportion within study arm. Continuous variables are presented as median and  
34  
35 17 interquartile range. Minimum and maximum values are not shown to ensure anonymity of the  
36  
37 18 participants.

38 19 Recurrence-free survival, i.e. time from ADT initiation to castration resistance, will be analyzed by  
39  
40 20 using Kaplan-Meier (KM) estimator, stratified by study arm. The statistical significance of the  
41  
42 21 difference between the survival estimates is tested with log-rank test. No adjustments will be used for  
43  
44 22 KM estimator as the study intervention is randomized. Risk of death, as well as risk for occurrence  
45  
46 23 of adverse tumor traits among men receiving atorvastatin compared to men receiving placebo will be  
47  
48 24 estimated using Cox proportional hazards regression.

49 25 Univariate analysis of changes in serum lipid levels is performed by calculating the difference after  
50  
51 26 – before for each participant. The statistical significance of the difference between the study arms is  
52  
53 27 analyzed by Mann-Whitney U-test (or by t-test if under normality). These results are complemented  
54  
55 28 with boxplots. Multivariable analysis for difference in serum lipid levels between the study arms are  
56  
57 29 performed by fitting a logistic regression model such that the study arm is used as the response  
58  
59 30 variable whereas lipid level differences are used as predictors (i.e., each lipid level difference as an  
60  
31 independent predictor). Lipid levels are expected to display heavy multi-collinearity; therefore,

1  
2  
3  
4  
5  
6  
7  
8  
9  
10  
11  
12  
13  
14  
15  
16  
17  
18  
19  
20  
21  
22  
23  
24  
25  
26  
27  
28  
29  
30  
31  
32  
33  
34  
35  
36  
37  
38  
39  
40  
41  
42  
43  
44  
45  
46  
47  
48  
49  
50  
51  
52  
53  
54  
55  
56  
57  
58  
59  
60

1 variance inflation factors (VIF) are calculated for each coefficient afterwards, and possible  
2 adjustments made by dropping predictors with extreme VIFs (> 10).

3 The occurrence of adverse tumor genomic traits will be analysed by calculating the proportion of  
4 participants developing adverse tumor genomic traits. The statistical significance between the  
5 proportions is tested by proportions test.

6 The WHOQOL-BREF patient reported outcome (PRO) of the quality-of-life is analysed by tabulating  
7 absolute and relative frequencies. Chi-squared test for homogeneity is used to test the statistical  
8 significance of the difference between the study arms of each PRO item

9 Subgroup analyses will be performed stratified by type of ADT or antiandrogen therapy initially  
10 selected; GnRH agonists/antagonists, antiandrogen, orchiectomy, or other. Men who start with  
11 antiandrogen therapy often change to GnRH agonists/antagonists or orchiectomy when PSA increases  
12 during ADT. This is allowed and PSA recurrence during antiandrogen therapy is not considered as  
13 disease progression as serum testosterone needs to be at castrate level as well for meeting the primary  
14 endpoint.

15 Another subgroup analysis will be stratified by whether or not the participants have received local  
16 therapy (radiation or surgery) for prostate cancer in addition to ADT and by type of additional therapy  
17 participant has received; docetaxel, abiraterone, enzalutamide, or apalutamide at hormone-sensitive  
18 stage in addition to ADT.

19 All analyses will include only participants with available data, imputations will not be used. Detailed  
20 statistical analysis plan is published before final data analysis. All analyses are performed using SPSS,  
21 Stata and R statistical softwares.

## 22 **Quality control**

23 The study steering committee includes investigators from each participating recruitment center. The  
24 steering committee will meet twice a year to oversee trial progression of the recruitment, integrity of  
25 collected data and discuss possible protocol amendments.

26 External trained study monitors independent from the study sponsors ensure the data quality and good  
27 clinical practice by making regular yearly check-up visits to participating study centers. This will be  
28 separately arranged in each participating country.

## 1 **Reporting and registering of adverse effects**

2 The participants are advised to contact the researchers in case of suspected adverse effect related to  
3 the study drug. If the side-effects are intolerable the study drug will be discontinued. In uncertain  
4 cases serum levels of creatine kinase (U/l), alanine aminotransferase (U/l) and creatinine ( $\mu\text{mol/l}$ )  
5 are checked to see if any of these have changed considerably compared to the baseline. If the  
6 laboratory tests are not normal, or if the participant or the attending physician finds the side-effects  
7 alarming the study drug will be discontinued. Study database records specifically most common  
8 adverse effects muscular pain, elevated fasting blood glucose ( $> 6,1 \text{ mmol/l}$ ) and elevated serum  
9 creatine kinase ( $>280 \text{ U/l}$ ), even when they do not lead to discontinuation of the study drug.

10 Trial database, REDCap, includes separate question for serious adverse effects as evaluated by  
11 CTCAE criteria, version 5.0. If serious side-effects are reported, REDCap asks to fulfill separate  
12 query where detailed description of the adverse effect is given according to CTCAE criteria. Study  
13 sponsor and coordinator will be automatically notified via e-mail if serious adverse effect is reported  
14 in the database. All serious adverse effect that threatens life or health are reported to national authority  
15 (FIMEA in Finland) within 7 days of detection. If a life-threatening adverse effect is suspected  
16 blinding will be lifted for the participant in case to see whether he has received atorvastatin or placebo.  
17 Unexpected adverse effects will be reported to national authority within 15 days of detection.

## 18 **Patients and public involvement**

19 In the design phase of the trial, primary investigator presented the study protocol in numerous public  
20 events, including patient advocacy group meetings, giving opportunity for the audience to give  
21 feedback and suggestions how to improve the study. Patient advocacy organizations of prostate  
22 cancer patients are actively involved in finding subjects for the study through announcements in their  
23 journals and by allowing investigators frequently promote the study in their meetings. Study results  
24 will be also reported in patient organization journals and social media sites for maximum visibility  
25 and distribution of trial outcomes.

## 26 **Ethics and dissemination**

27 This study is approved by the regional ethics committee of Pirkanmaa Hospital District, Science  
28 center, Tampere, Finland (R18065M). All participants read and sign informed consent form before  
29 study entry. The results of this study will be published in international peer reviewed journals.



1  
2  
3  
4  
5  
6  
7  
8  
9  
10  
11  
12  
13  
14  
15  
16  
17  
18  
19  
20  
21  
22  
23  
24  
25  
26  
27  
28  
29  
30  
31  
32  
33  
34  
35  
36  
37  
38  
39  
40  
41  
42  
43  
44  
45  
46  
47  
48  
49  
50  
51  
52  
53  
54  
55  
56  
57  
58  
59  
60

The trial is ethical for the following reasons 1); The study aims to improve treatment of metastatic prostate cancer, which is the second most common cause of cancer death in Western countries, 2); the potential scientific and societal benefits from the project are substantial. If the study hypothesis proves to be right, it will provide an entirely new way to prevent and/or delay progression of metastatic prostate cancer with atorvastatin, a drug that is cheap, well-tolerated, and with established cardiovascular benefits, 3); the study drug (atorvastatin) is known to be well-tolerated and it is currently widely used in management of hypercholesterolemia and cardiovascular disease. The adverse effects caused by the drug are usually mild and transient after stopping the study drug, and 4); randomized, placebo-controlled design ensures the study will produce highest quality evidence that will change prostate cancer treatment guidelines if the hypothesis proves to be right.

After publication of results for the primary endpoints, anonymized summary metadata and statistical code will be made openly available. The data will not include any information that could make it possible to identify a given participant.

## References

1. Finnish cancer registry statistics: <http://stats.cancerregistry.fi/stats/eng/veng0003m0.html>
2. Mäklin S, Rissanen P. Cancer expenses in Finland: <http://www.cancer.fi/@Bin/47734/Syöpien+aiheuttamat+kustannukset.pdf>
3. Ross RW Xie W, Regan MM, Pomerantz M, *et al.* Efficacy of androgen deprivation therapy (ADT) in patients with advanced prostate cancer: association between Gleason score, prostate-specific antigen level, and prior ADT exposure with duration of ADT effect. *Cancer* 2008;**112**:1247-53. doi: 10.1002/cncr.23304.
4. Botrel TE, Clark O, Lima Pompeo AC, *et al.* Efficacy and Safety of Combined Androgen Deprivation Therapy (ADT) and Docetaxel Compared with ADT Alone for Metastatic Hormone-Naive Prostate Cancer: A Systematic Review and Meta-Analysis. *PLoS One* 2016;**11**:e0157660. doi: 10.1371/journal.pone.0157660.
5. Sweeney CJ, Chen YH, Carducci M, *et al.* Chemohormonal Therapy in Metastatic Hormone-Sensitive Prostate Cancer. *N Engl J Med* 2015;**373**:737-46. doi: 10.1056/NEJMoa1503747
6. Seo WI, Kang PM, Kim TH, *et al.* Primary androgen deprivation therapy for prostate cancer in koreans: a retrospective multicenter study. *World J Mens Health*. 2014;**32**(3):159-66.

- 1  
2  
3 1 7. Mottet N, Van Damme J, Loulidi S, Russel C, Leitenberger A, Wolff JM. Intermittent  
4 2 hormonal therapy in the treatment of metastatic prostate cancer: a randomized trial. *BJU Int*  
5 3 2012;**110**:1262-9. doi: 10.1111/j.1464-410X.2012.11120.x.
- 6 3  
7 4  
8 4 8. Arthur R, Møller H, Garmo H, *et al.* Association between baseline serum glucose,  
9 5 triglycerides and total cholesterol, and prostate cancer risk categories. *Cancer Med*  
10 6 2016;**5**:1307-18. doi: 10.1002/cam4.665
- 11 6  
12 7  
13 7 9. Murtola TJ, Syväälä H, Pennanen P, *et al.* Comparative effects of high and low-dose  
14 8 simvastatin on prostate epithelial cells: the role of LDL. *Eur J Pharmacol* 2011;**673**:96-100.  
15 9 doi: 10.1016/j.ejphar.2011.10.022.
- 16 9  
17 10  
18 10 10. Murtola TJ, Syväälä H, Pennanen P, *et al.* The importance of LDL and cholesterol metabolism  
19 11 for prostate epithelial cell growth. *PLoS One* 2012;**7**:e39445. doi:  
20 12 10.1371/journal.pone.0039445.
- 21 12  
22 13  
23 13 11. Ackerman D, Simon MC. Hypoxia, lipids, and cancer: surviving the harsh tumor  
24 14 microenvironment. *Trends Cell Biol* 2014;**24**:472-8. doi: 10.1016/j.tcb.2014.06.001.
- 25 14  
26 15  
27 15 12. Herber DL, Cao W, Nefedova Y *et al.* Lipid accumulation and dendritic cell dysfunction in  
28 16 cancer. *Nat Med* 2010;**16**:880-6. doi: 10.1038/nm.2172
- 29 16  
30 17  
31 17 13. Han W, Gao S, Barrett D, *et al.* Reactivation of androgen receptor-regulated lipid biosynthesis  
32 18 drives the progression of castration-resistant prostate cancer. *Oncogene* 2018;**37**:710-21. doi:  
33 19 10.1038/onc.2017.385.
- 34 19  
35 20  
36 20 14. Raval AD, Thakker D, Negi H, *et al.* Association between statins and clinical outcomes  
37 21 among men with prostate cancer: a systematic review and meta-analysis. *Prostate Cancer*  
38 22 *Prostatic Dis* 2016;**19**:222. doi: 10.1038/pcan.2016.3
- 39 22  
40 23  
41 23 15. Barfeld SJ, Itkonen HM, Urbanucci A, *et al.* Androgen-regulated metabolism and  
42 24 biosynthesis in prostate cancer. *Endocr Relat Cancer* 2014;**21**:T57-66. doi: 10.1530/ERC-13-  
43 24 0515.
- 44 25  
45 26  
46 26 16. Dambal S, Howard LE, Allott EH, *et al.* Serum Lipids prior to Starting Androgen Deprivation  
47 27 Therapy and Risk of Castration Resistant Prostate Cancer and Metastasis: Results from the  
48 28 SEARCH Database. *J Urol* 2020;**203**:120-7. doi: 10.1097/JU.0000000000000494
- 49 28  
50 29  
51 29 17. Van Rompay MI, Solomon KR, Nickel JC, *et al.* Prostate cancer incidence and mortality  
52 30 among men using statins and non-statin lipid-lowering medications. *Eur J Cancer*  
53 31 2019;**112**:118-26. doi: 10.1016/j.ejca.2018.11.033.
- 54 31  
55 32  
56 32 18. Kumar A, Riviere P, Luterstein E, *et al.* Associations among statins, preventive care, and  
57 33 prostate cancer mortality. *Prostate Cancer Prostatic Dis* 2020. doi: 10.1038/s41391-020-  
58 33 0207-5
- 59 33  
60 34



- 1  
2  
3 1 19. Murai T. Cholesterol lowering: role in cancer prevention and treatment. *Biol Chem*  
4 2015;**396**:1-11. doi: 10.1515/hsz-2014-0194.  
5 2  
6 3  
7 3 20. Garcia-Ruiz C, Morales A, Fernandez-Checa JC. Statins and protein prenylation in cancer  
8 4 cell biology and therapy. *Anticancer Agents Med Chem* 2012;**12**:303-15. doi:  
9 10.2174/187152012800228715  
10 5  
11 6  
12 6 21. Armandari I, Hamid AR, Verhaegh G, *et al.* Intratumoral steroidogenesis in castration-  
13 7 resistant prostate cancer: a target for therapy. *Prostate Int* 2014;**2**:105-13. doi:  
14 10.12954/PI.14063.  
15 8  
16 9  
17 9 22. Mokarram P, Alizadeh J, Razban V, *et al.* Interconnection of Estrogen/Testosterone  
18 10 Metabolism and Mevalonate Pathway in Breast and Prostate Cancers. *Curr Mol Pharmacol*  
19 2017;**10**:86-114. doi: 10.2174/1874467209666160112125631.  
20 11  
21 12  
22 12 23. Harshman LC, Wang X, Nakabayashi M, *et al.* Statin use at the time of initiation of androgen  
23 13 deprivation therapy and time to progression in patients with hormone-sensitive prostate  
24 14 cancer. *JAMA Oncol* 2015;**1**:495-504. doi: 10.1001/jamaoncol.2015.0829.  
25 15  
26 16  
27 15 24. Jung J, Lee C, Lee C, *et al.* Effects of statin use on the response duration to androgen  
28 16 deprivation therapy in metastatic prostate cancer. *Korean J Urol* 2015;**56**:630-6. doi:  
29 10.4111/kju.2015.56.9.630.  
30 17  
31 18  
32 18 25. Syvälä H, Pennanen P, Bläuer M, *et al.* Additive inhibitory effects of simvastatin and  
33 19 enzalutamide on androgen-sensitive LNCaP and VCaP prostate cancer cells. *Biochem*  
34 20 *Biophys Res Commun* 2016;**481**:46-50. doi: 10.1016/j.bbrc.2016.11.021  
35 21  
36 20 26. Yang H, Pang L, Hu X, *et al.* The effect of statins on advanced prostate cancer patients with  
37 21 androgen deprivation therapy or abiraterone/enzalutamide: A systematic review and meta-  
38 22 analysis. *J Clin Pharm Ther* 2020;**45**:488-95. doi: 10.1111/jcpt.13092  
39 23  
40 24  
41 24 27. Lv HL, Jin DM, Liu M, *et al.* Long-term efficacy and safety of statin treatment beyond six  
42 25 years: a meta-analysis of randomized controlled trials with extended follow-up. *Pharmacol*  
43 26 *Res* 2014;**81**:64-73. doi: 10.1016/j.phrs.2014.02.006.  
44 27  
45 28  
46 27 28. Murtola T, Riikonen J, Syvälä H, *et al.* Atorvastatin Versus Placebo for Prostate Cancer  
47 28 Before Radical Prostatectomy-A Randomized, Double-blind, Placebo-controlled Clinical  
48 29 Trial. *Eur Urol* 2018;**74**:697-701. doi: 10.1016/j.eururo.2018.06.037.  
49 30  
50 30 29. Longo J, Hamilton RJ, Masoomian M, *et al.* A pilot window-of-opportunity study of  
51 31 preoperative fluvastatin in localized prostate cancer. *Prostate Cancer Prostatic Dis* 2020  
52 32 ;**23**:630-37. doi: 10.1038/s41391-020-0221-7  
53  
54  
55  
56  
57  
58  
59  
60

- 1  
2  
3 1 30. Hamilton RJ, Ding K, Crook JM, *et al.* The Association Between Statin Use and Outcomes  
4 2 in Patients Initiating Androgen Deprivation Therapy. *Eur Urol* 2020 (article in press)  
5 3 <https://doi.org/10.1016/j.eururo.2020.12.031>  
6 4  
7 31. Harris PA, Taylor R, Thielke R, *et al.* Research electronic data capture (REDCap) – A  
8 5 metadata-driven methodology and workflow process for providing translational research  
9 6 informatics support. *J Biomed Inform* 2009;**42**:377-81. doi: 10.1016/j.jbi.2008.08.010  
10 7  
11 32. Harris PA, Taylor R, Minor BL, *et al.* The REDCap consortium: Building an international  
12 8 community of software partners. *J Biomed Inform* 2019;**95**:103208. doi:  
13 9 10.1016/j.jbi.2019.103208.  
14 10  
15 33. WHOQOL-BREF, The World Health Organization Quality of Life, THL  
16 11  
17 34. Mateo J, Boysen G, Barbieri CE, *et al.* DNA repair in prostate cancer: biology and clinical  
18 12 implications. *Eur Urol* 2017;**71**:417-25. doi: 10.1016/j.eururo.2016.08.037  
19 13  
20 35. Xu J, Qiu Y. Role of androgen receptor splice variants in prostate cancer metastasis. *Asian J*  
21 14 *Urol* 2016;**3**:177-84. doi: 10.1016/j.ajur.2016.08.003.  
22 15  
23 36. Le QT, Courter D. Clinical biomarkers for hypoxia targeting. *Cancer Metastasis Rev*  
24 16 2008;**27**:351-62. doi: 10.1007/s10555-008-9144-9  
25 17  
26 37. Stieb S, Eleftheriou A, Warnock G, *et al.* Longitudinal PET imaging of tumor hypoxia during  
27 18 the course of radiotherapy. *Eur J Nucl Med Mol Imaging* 2018;**45**:2201-17.doi:  
28 19 10.1007/s00259-018-4116-y  
29 20  
30 38. Hunt SJ, Seraj SM, Alavi A. PET Assessment of Immune Effects from Interventional  
31 21 Oncology Procedures. *PET Clin* 2019;**14**:477-85. doi: 10.1016/j.cpet.2019.06.007.  
32  
33  
34  
35  
36  
37  
38  
39

40 22 **Authors' contributions:** T.J.M. is the primarily investigator of this study and designed and planned  
41 23 the study with the help from all other authors. J.R., T.P., O.E., P.B., H.S., A.K., T.L.J.T., M.F., P.Ø.,  
42 24 A.R., T.M., A.Sa., H.R., S.L., and T.J.M. will be conducting the study at the study centers. M.H. and  
43 25 P.V.R. planned and will conduct the statistical analysis of the study. T.L helped to plan and  
44 26 collaborate in analysis of lipidomic profile. A.Si is coordinator of the trial. A.Si. and T.J.M. wrote  
45 27 the first draft of the manuscript. All other authors further contributed to manuscript preparation and  
46 28 accepted the final version of the manuscript.  
47  
48  
49  
50  
51  
52

53 29 **Funding:** This study is supported by grants from Finnish Cancer Foundation (grant numbers 024194  
54 30 and 3122800563 (TJM) and 16112016 (TL)), Nordic Cancer Union (grant number MS793 (TJM)),  
55 31 Päivikki and Sakari Sohlberg Foundation (grant number 31228005901 (AS)), competitive research  
56 32 grant of Pirkanmaa hospital district (grant number 9X032 (TJM) and grant X51001 (TL)), and the  
57 33 Academy of Finland (grants numbers 322098 (TL), and 3121330724 (TJM)).  
58  
59  
60

1  
2  
3  
4  
5  
6  
7  
8  
9  
10  
11  
12  
13  
14  
15  
16  
17  
18  
19  
20  
21  
22  
23  
24  
25  
26  
27  
28  
29  
30  
31  
32  
33  
34  
35  
36  
37  
38  
39  
40  
41  
42  
43  
44  
45  
46  
47  
48  
49  
50  
51  
52  
53  
54  
55  
56  
57  
58  
59  
60

**Disclaimer:** None of the funders has a role in the design, management, analysis or interpretation of data, or writing and publication of results.

**Competing interests:** Peter Østergren: honorarium as speaker from Ipsen A/S, Ferring Pharmaceuticals, and Astellas Pharma. Mikkel Fode: consultant fees and honorarium as speaker from Astellas and Ferring. Hanna Ronkainen: consultant fees from Bayer AB and honorarium as speaker from Sanofi. Teemu J Murtola: Consultant fees from Astellas, Janssen, speaker's honorarium from Astellas, Janssen and Sanofi, participation in scientific meetings at the expense of Ferring, Pfizer, and Sanofi, stockholder for Arocell AB. Peter Boström: consultant fees from Astellas Pharma. All other authors: No competing interests to declare.

**Data sharing:** There are no additional unpublished data at this point of this study.

Captions to Figure and Tables:

Figure 1. Study flow with inclusion and exclusion criteria.

Figure 2. Sample size estimation with power 0.8 as a function of hazard ratio. Calculation was made based on study by Harshman et al.<sup>23</sup>

Table 1. Study setting of Impact of atorvastatin on prostate cancer after initiation of androgen deprivation therapy -clinical trial

Table 2. Study flow and timing of the laboratory and blood sample collection

1  
2  
3  
4  
5  
6  
7  
8  
9  
10  
11  
12  
13  
14  
15  
16  
17  
18  
19  
20  
21  
22  
23  
24  
25  
26  
27  
28  
29  
30  
31  
32  
33  
34  
35  
36  
37  
38  
39  
40  
41  
42  
43  
44  
45  
46  
47  
48  
49  
50  
51  
52  
53  
54  
55  
56  
57  
58  
59  
60

For peer review only

18 Table 1. Study setting of Impact of atorvastatin on prostate cancer after initiation of androgen  
19 deprivation therapy -clinical trial.

1  
2  
3  
4  
5  
6  
7  
8  
9  
10  
11  
12  
13  
14  
15  
16  
17  
18  
19  
20  
21  
22  
23  
24  
25  
26  
27  
28  
29  
30  
31  
32  
33  
34  
35  
36  
37  
38  
39  
40  
41  
42  
43  
44  
45  
46  
47  
48  
49  
50  
51  
52  
53  
54  
55  
56  
57  
58  
59  
60

|                                               |                                                                                                                                                                                                                                                                                                                                                                                                                                                                                                                                                                                                   |
|-----------------------------------------------|---------------------------------------------------------------------------------------------------------------------------------------------------------------------------------------------------------------------------------------------------------------------------------------------------------------------------------------------------------------------------------------------------------------------------------------------------------------------------------------------------------------------------------------------------------------------------------------------------|
| <b>Study settings</b>                         |                                                                                                                                                                                                                                                                                                                                                                                                                                                                                                                                                                                                   |
| Primary registry and trial identifying number | Clinicaltrials.gov NCT04026230                                                                                                                                                                                                                                                                                                                                                                                                                                                                                                                                                                    |
| Date of registration in primary registry      | July 19, 2019                                                                                                                                                                                                                                                                                                                                                                                                                                                                                                                                                                                     |
| Secondary identifying numbers                 | Eudra-CT: 2016-004774-17, Protocol code: ESTO2                                                                                                                                                                                                                                                                                                                                                                                                                                                                                                                                                    |
| Source(s) of monetary or material support     | Tampere University Hospital, Finland                                                                                                                                                                                                                                                                                                                                                                                                                                                                                                                                                              |
| Primary sponsor                               | Tampere University Hospital, Finland                                                                                                                                                                                                                                                                                                                                                                                                                                                                                                                                                              |
| Secondary sponsor(s)                          | Helsinki University Hospital, Turku University Hospital, Central Finland Central Hospital, Kuopio University Hospital, Oulu University Hospital, Finland, Herlev Hospital, Denmark, University Hospital Tartu, Estonia, Vestfold Hospital Trust, Tønsberg, Norway                                                                                                                                                                                                                                                                                                                                 |
| Contact for public queries                    | Tampere University Hospital, Teemu Murtola, MD, PhD                                                                                                                                                                                                                                                                                                                                                                                                                                                                                                                                               |
| Contact for scientific queries                | Tampere University Hospital, Teemu Murtola, MD, PhD                                                                                                                                                                                                                                                                                                                                                                                                                                                                                                                                               |
| Public title                                  | Impact of atorvastatin on prostate cancer progression after initiation of androgen deprivation therapy                                                                                                                                                                                                                                                                                                                                                                                                                                                                                            |
| Scientific title                              | Impact of atorvastatin on prostate cancer progression after initiation of androgen deprivation therapy – lipid metabolism as a novel biomarker to predict prostate cancer progression – phase 3, double-blind randomized clinical trial FinnProstata XV                                                                                                                                                                                                                                                                                                                                           |
| Countries of recruitment                      | Finland, Denmark, Estonia, Norway                                                                                                                                                                                                                                                                                                                                                                                                                                                                                                                                                                 |
| Health condition studied                      | Metastatic or recurrent prostate cancer                                                                                                                                                                                                                                                                                                                                                                                                                                                                                                                                                           |
| Intervention                                  | Active comparator: Capsules of atorvastatin 80 mg, Placebo comparator: Similar capsules as in the atorvastatin arm, but without the active ingredient                                                                                                                                                                                                                                                                                                                                                                                                                                             |
| Key inclusion and exclusion criteria          | Inclusion criteria: Histopathologically confirmed metastatic adenocarcinoma of the prostate for which androgen deprivation or antiandrogen therapy is initiated no longer than 3 months before the primary treatment<br>Willingness to participate and signing of informed consent<br>Exclusion criteria: Statin use at the time of recruitment or within 3 months of it, Previous adverse effects during statin therapy, family history of hypercholesterolemia or very high total cholesterol, clinically significant renal or liver insufficiency, use of drugs that may interact with statins |
| Sexes eligible for study:                     | Male                                                                                                                                                                                                                                                                                                                                                                                                                                                                                                                                                                                              |
| Accepts healthy volunteers                    | No                                                                                                                                                                                                                                                                                                                                                                                                                                                                                                                                                                                                |
| Study type                                    | Interventional, Allocation: randomized, Intervention model: parallel assignment with 1:1 allocation ratio, Masking: double blind (subject, caregiver, investigator, outcomes assessor), Primary purpose: prevention, Phase III                                                                                                                                                                                                                                                                                                                                                                    |
| Date of first enrolment                       | July 2019                                                                                                                                                                                                                                                                                                                                                                                                                                                                                                                                                                                         |
| Target sample size                            | 400                                                                                                                                                                                                                                                                                                                                                                                                                                                                                                                                                                                               |
| Recruitment status                            | Recruiting                                                                                                                                                                                                                                                                                                                                                                                                                                                                                                                                                                                        |
| Primary outcome(s)                            | Castration resistance                                                                                                                                                                                                                                                                                                                                                                                                                                                                                                                                                                             |
| Key secondary outcomes                        | Lipid levels, Prostate cancer mortality and overall survival, Circulating PSA, PSA doubling time, Time to next antiandrogen therapy                                                                                                                                                                                                                                                                                                                                                                                                                                                               |

Table 2. Study flow and timing of the laboratory and blood sample collection.

| TIMEPOINT                                                                                   | Enrollment | Allocation | Follow-up |     |     |     |
|---------------------------------------------------------------------------------------------|------------|------------|-----------|-----|-----|-----|
|                                                                                             |            |            | 0 6m      | 12m | 18m | 24m |
| <b>ENROLLMENT:</b>                                                                          |            |            |           |     |     |     |
| Eligibility screen                                                                          | x          |            |           |     |     |     |
| Informed consent                                                                            | x          |            |           |     |     |     |
| Allocation                                                                                  |            | x          |           |     |     |     |
| <b>INTERVENTIONS:+</b>                                                                      |            |            |           |     |     |     |
| Atorvastatin                                                                                |            |            | x         | x   | x   | x   |
| Placebo                                                                                     |            |            | x         | x   | x   | x   |
| <b>ASSESMENTS:</b>                                                                          |            |            |           |     |     |     |
| Serum PSA (ng/ml)                                                                           | x          |            | x         | x   | x   | x   |
| Alkaline phosphatase (U/l)                                                                  | x          |            | x         | x   | x   | x   |
| Creatinine (µmol/l)                                                                         | x          |            | x         | x   | x   | x   |
| Serum creatine kinase (U/l)                                                                 | x          |            | x         | x   | x   | x   |
| Alanine aminotransferase (U/l)                                                              | x          |            | x         | x   | x   | x   |
| Fasting blood glucose (mmol/l)                                                              | x          |            | x         | x   | x   | x   |
| Lipid levels (total cholesterol, LDL, HDL, and triglycerides) (mmol/l)                      | x          |            | x         | x   | x   | x   |
| Cell free DNA (subgroup)^                                                                   | x          |            |           |     |     |     |
| QoL                                                                                         | x          |            |           | x   |     | x   |
| m=month, QoL=quality of life, PSA=prostate-specific antigen                                 |            |            |           |     |     |     |
| *follow-up until disease recurrence, death, or max. 10 years                                |            |            |           |     |     |     |
| + allocation 1:1 to have either 80 mg atorvastatin or placebo daily                         |            |            |           |     |     |     |
| ^Cell free DNA is measured before allocation and after occurrence of castration resistance. |            |            |           |     |     |     |

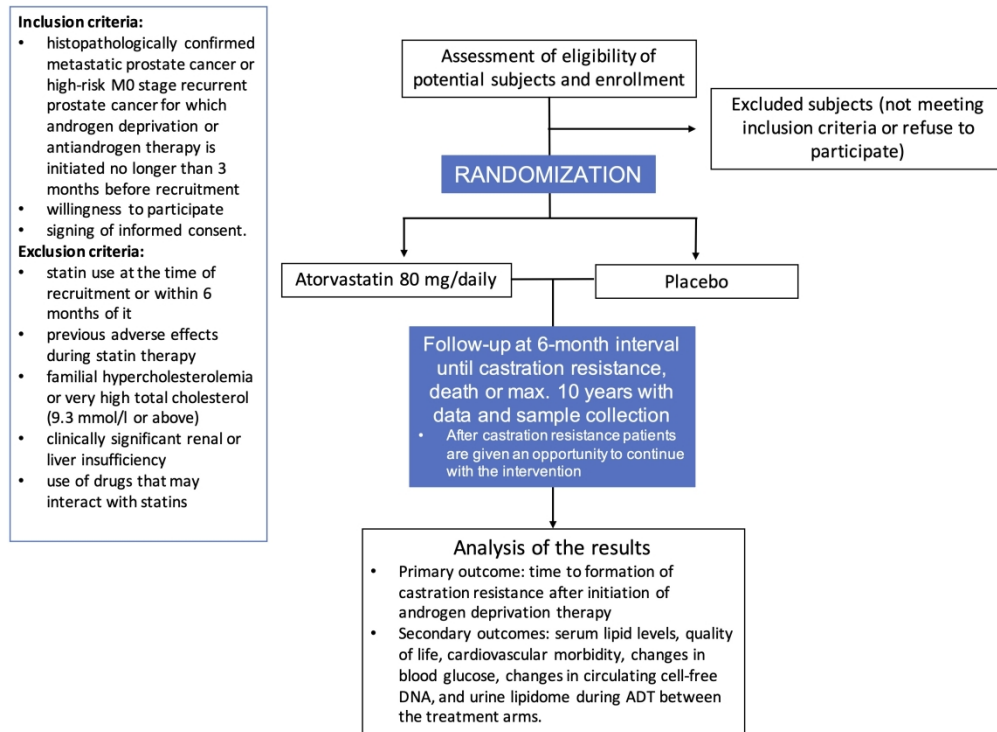

Study flow with inclusion and exclusion criteria.

1184x868mm (72 x 72 DPI)

**Sample size as a function of HR, power = 0.8**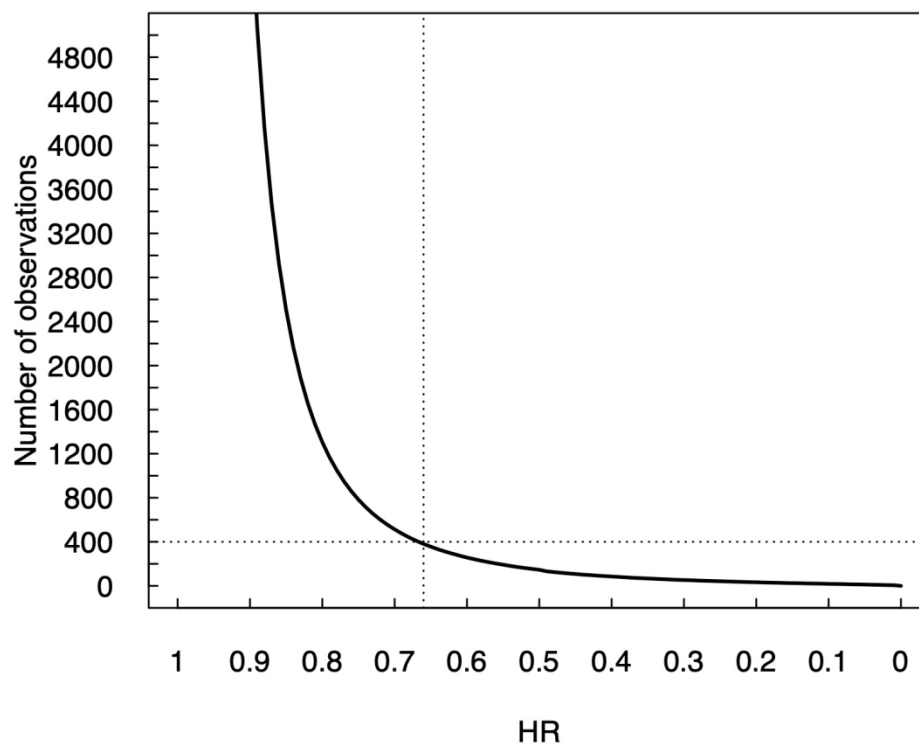

Sample size estimation with power 0.8 as a function of hazard ratio. Calculation was made based on study by Harshman et al.<sup>23</sup>

599x549mm (72 x 72 DPI)



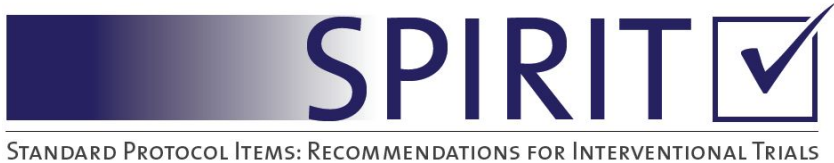

1  
2  
3  
4  
5  
6  
7  
8  
9  
10  
11  
12  
13  
14  
15  
16  
17  
18  
19  
20  
21  
22  
23  
24  
25  
26  
27  
28  
29  
30  
31  
32  
33  
34  
35  
36  
37  
38  
39  
40  
41  
42  
43  
44  
45  
46

SPIRIT 2013 Checklist: Recommended items to address in a clinical trial protocol and related documents\*

| Section/item                      | Item No | Description                                                                                                                                                                                                                                                                              | Addressed on page number |
|-----------------------------------|---------|------------------------------------------------------------------------------------------------------------------------------------------------------------------------------------------------------------------------------------------------------------------------------------------|--------------------------|
| <b>Administrative information</b> |         |                                                                                                                                                                                                                                                                                          |                          |
| Title                             | 1       | Descriptive title identifying the study design, population, interventions, and, if applicable, trial acronym                                                                                                                                                                             | _____ 1 _____            |
| Trial registration                | 2a      | Trial identifier and registry name. If not yet registered, name of intended registry                                                                                                                                                                                                     | _____ 2 _____            |
|                                   | 2b      | All items from the World Health Organization Trial Registration Data Set                                                                                                                                                                                                                 | _____                    |
| Protocol version                  | 3       | Date and version identifier                                                                                                                                                                                                                                                              | _____ 2 _____            |
| Funding                           | 4       | Sources and types of financial, material, and other support                                                                                                                                                                                                                              | _____ 14 _____           |
| Roles and responsibilities        | 5a      | Names, affiliations, and roles of protocol contributors                                                                                                                                                                                                                                  | _____ 1 _____            |
|                                   | 5b      | Name and contact information for the trial sponsor                                                                                                                                                                                                                                       | _____ 1 _____            |
|                                   | 5c      | Role of study sponsor and funders, if any, in study design; collection, management, analysis, and interpretation of data; writing of the report; and the decision to submit the report for publication, including whether they will have ultimate authority over any of these activities | _____ 14 _____           |
|                                   | 5d      | Composition, roles, and responsibilities of the coordinating centre, steering committee, endpoint adjudication committee, data management team, and other individuals or groups overseeing the trial, if applicable (see Item 21a for data monitoring committee)                         | _____ 10 _____           |

1 **Introduction**

2

3 Background and rationale 6a Description of research question and justification for undertaking the trial, including summary of relevant studies (published and unpublished) examining benefits and harms for each intervention \_\_\_ 3-4 \_\_\_

4

5

6 6b Explanation for choice of comparators \_\_\_ 3-4 \_\_\_

7

8 Objectives 7 Specific objectives or hypotheses \_\_\_ 5 \_\_\_

9

10 Trial design 8 Description of trial design including type of trial (eg, parallel group, crossover, factorial, single group), allocation ratio, and framework (eg, superiority, equivalence, noninferiority, exploratory) \_\_\_ 5-6 \_\_\_

11

12

13

14 **Methods: Participants, interventions, and outcomes**

15

16 Study setting 9 Description of study settings (eg, community clinic, academic hospital) and list of countries where data will be collected. Reference to where list of study sites can be obtained \_\_\_ 5-6 \_\_\_

17

18

19 Eligibility criteria 10 Inclusion and exclusion criteria for participants. If applicable, eligibility criteria for study centres and individuals who will perform the interventions (eg, surgeons, psychotherapists) \_\_\_ 6 \_\_\_

20

21

22 Interventions 11a Interventions for each group with sufficient detail to allow replication, including how and when they will be administered \_\_\_ 7-8 \_\_\_

23

24

25 11b Criteria for discontinuing or modifying allocated interventions for a given trial participant (eg, drug dose change in response to harms, participant request, or improving/worsening disease) \_\_\_ 6 \_\_\_

26

27

28 11c Strategies to improve adherence to intervention protocols, and any procedures for monitoring adherence (eg, drug tablet return, laboratory tests) \_\_\_ 7-8 \_\_\_

29

30

31 11d Relevant concomitant care and interventions that are permitted or prohibited during the trial \_\_\_ 8 \_\_\_

32

33

34 Outcomes 12 Primary, secondary, and other outcomes, including the specific measurement variable (eg, systolic blood pressure), analysis metric (eg, change from baseline, final value, time to event), method of aggregation (eg, median, proportion), and time point for each outcome. Explanation of the clinical relevance of chosen efficacy and harm outcomes is strongly recommended \_\_\_ 6-7 \_\_\_

35

36

37

38

39

40 Participant timeline 13 Time schedule of enrolment, interventions (including any run-ins and washouts), assessments, and visits for participants. A schematic diagram is highly recommended (see Figure) \_\_\_ 7-8, Table 2 \_\_\_

41

42

43

44

45

46

1 Sample size 14 Estimated number of participants needed to achieve study objectives and how it was determined, including \_\_\_\_\_ 8-9 \_\_\_\_\_  
 2 clinical and statistical assumptions supporting any sample size calculations

3  
 4 Recruitment 15 Strategies for achieving adequate participant enrolment to reach target sample size \_\_\_\_\_ 8-9 \_\_\_\_\_  
 5

6 **Methods: Assignment of interventions (for controlled trials)**

7  
 8 Allocation:

9  
 10 Sequence 16a Method of generating the allocation sequence (eg, computer-generated random numbers), and list of any \_\_\_\_\_ 7 \_\_\_\_\_  
 11 generation factors for stratification. To reduce predictability of a random sequence, details of any planned restriction  
 12 (eg, blocking) should be provided in a separate document that is unavailable to those who enrol participants  
 13 or assign interventions  
 14  
 15

16 Allocation 16b Mechanism of implementing the allocation sequence (eg, central telephone; sequentially numbered, \_\_\_\_\_ 7 \_\_\_\_\_  
 17 concealment opaque, sealed envelopes), describing any steps to conceal the sequence until interventions are assigned  
 18 mechanism  
 19

20 Implementation 16c Who will generate the allocation sequence, who will enrol participants, and who will assign participants to \_\_\_\_\_ 7 \_\_\_\_\_  
 21 interventions  
 22  
 23

24 Blinding (masking) 17a Who will be blinded after assignment to interventions (eg, trial participants, care providers, outcome \_\_\_\_\_ 7 \_\_\_\_\_  
 25 assessors, data analysts), and how  
 26

27 17b If blinded, circumstances under which unblinding is permissible, and procedure for revealing a participant's \_\_\_\_\_ 7 \_\_\_\_\_  
 28 allocated intervention during the trial  
 29  
 30

31 **Methods: Data collection, management, and analysis**

32  
 33 Data collection 18a Plans for assessment and collection of outcome, baseline, and other trial data, including any related \_\_\_\_\_ 7-8 \_\_\_\_\_  
 34 methods processes to promote data quality (eg, duplicate measurements, training of assessors) and a description of  
 35 study instruments (eg, questionnaires, laboratory tests) along with their reliability and validity, if known.  
 36 Reference to where data collection forms can be found, if not in the protocol  
 37

38  
 39 18b Plans to promote participant retention and complete follow-up, including list of any outcome data to be \_\_\_\_\_ 6 \_\_\_\_\_  
 40 collected for participants who discontinue or deviate from intervention protocols  
 41  
 42

|    |                                 |     |                                                                                                                                                                                                                                                                                                                                       |                 |
|----|---------------------------------|-----|---------------------------------------------------------------------------------------------------------------------------------------------------------------------------------------------------------------------------------------------------------------------------------------------------------------------------------------|-----------------|
| 1  | Data management                 | 19  | Plans for data entry, coding, security, and storage, including any related processes to promote data quality (eg, double data entry; range checks for data values). Reference to where details of data management procedures can be found, if not in the protocol                                                                     | _____5_____     |
| 2  |                                 |     |                                                                                                                                                                                                                                                                                                                                       |                 |
| 3  |                                 |     |                                                                                                                                                                                                                                                                                                                                       |                 |
| 4  |                                 |     |                                                                                                                                                                                                                                                                                                                                       |                 |
| 5  | Statistical methods             | 20a | Statistical methods for analysing primary and secondary outcomes. Reference to where other details of the statistical analysis plan can be found, if not in the protocol                                                                                                                                                              | __9-10_____     |
| 6  |                                 |     |                                                                                                                                                                                                                                                                                                                                       |                 |
| 7  |                                 |     |                                                                                                                                                                                                                                                                                                                                       |                 |
| 8  |                                 | 20b | Methods for any additional analyses (eg, subgroup and adjusted analyses)                                                                                                                                                                                                                                                              | __9-10_____     |
| 9  |                                 |     |                                                                                                                                                                                                                                                                                                                                       |                 |
| 10 |                                 | 20c | Definition of analysis population relating to protocol non-adherence (eg, as randomised analysis), and any statistical methods to handle missing data (eg, multiple imputation)                                                                                                                                                       | _____10_____    |
| 11 |                                 |     |                                                                                                                                                                                                                                                                                                                                       |                 |
| 12 |                                 |     |                                                                                                                                                                                                                                                                                                                                       |                 |
| 13 |                                 |     |                                                                                                                                                                                                                                                                                                                                       |                 |
| 14 | <b>Methods: Monitoring</b>      |     |                                                                                                                                                                                                                                                                                                                                       |                 |
| 15 |                                 |     |                                                                                                                                                                                                                                                                                                                                       |                 |
| 16 | Data monitoring                 | 21a | Composition of data monitoring committee (DMC); summary of its role and reporting structure; statement of whether it is independent from the sponsor and competing interests; and reference to where further details about its charter can be found, if not in the protocol. Alternatively, an explanation of why a DMC is not needed | _____10_____    |
| 17 |                                 |     |                                                                                                                                                                                                                                                                                                                                       |                 |
| 18 |                                 |     |                                                                                                                                                                                                                                                                                                                                       |                 |
| 19 |                                 |     |                                                                                                                                                                                                                                                                                                                                       |                 |
| 20 |                                 |     |                                                                                                                                                                                                                                                                                                                                       |                 |
| 21 |                                 |     |                                                                                                                                                                                                                                                                                                                                       |                 |
| 22 |                                 | 21b | Description of any interim analyses and stopping guidelines, including who will have access to these interim results and make the final decision to terminate the trial                                                                                                                                                               | _____6, 11_____ |
| 23 |                                 |     |                                                                                                                                                                                                                                                                                                                                       |                 |
| 24 |                                 |     |                                                                                                                                                                                                                                                                                                                                       |                 |
| 25 | Harms                           | 22  | Plans for collecting, assessing, reporting, and managing solicited and spontaneously reported adverse events and other unintended effects of trial interventions or trial conduct                                                                                                                                                     | _____11_____    |
| 26 |                                 |     |                                                                                                                                                                                                                                                                                                                                       |                 |
| 27 |                                 |     |                                                                                                                                                                                                                                                                                                                                       |                 |
| 28 | Auditing                        | 23  | Frequency and procedures for auditing trial conduct, if any, and whether the process will be independent from investigators and the sponsor                                                                                                                                                                                           | _____10_____    |
| 29 |                                 |     |                                                                                                                                                                                                                                                                                                                                       |                 |
| 30 |                                 |     |                                                                                                                                                                                                                                                                                                                                       |                 |
| 31 |                                 |     |                                                                                                                                                                                                                                                                                                                                       |                 |
| 32 | <b>Ethics and dissemination</b> |     |                                                                                                                                                                                                                                                                                                                                       |                 |
| 33 |                                 |     |                                                                                                                                                                                                                                                                                                                                       |                 |
| 34 | Research ethics approval        | 24  | Plans for seeking research ethics committee/institutional review board (REC/IRB) approval                                                                                                                                                                                                                                             | _____10_____    |
| 35 |                                 |     |                                                                                                                                                                                                                                                                                                                                       |                 |
| 36 |                                 |     |                                                                                                                                                                                                                                                                                                                                       |                 |
| 37 | Protocol amendments             | 25  | Plans for communicating important protocol modifications (eg, changes to eligibility criteria, outcomes, analyses) to relevant parties (eg, investigators, REC/IRBs, trial participants, trial registries, journals, regulators)                                                                                                      | _____10_____    |
| 38 |                                 |     |                                                                                                                                                                                                                                                                                                                                       |                 |
| 39 |                                 |     |                                                                                                                                                                                                                                                                                                                                       |                 |
| 40 |                                 |     |                                                                                                                                                                                                                                                                                                                                       |                 |
| 41 |                                 |     |                                                                                                                                                                                                                                                                                                                                       |                 |
| 42 |                                 |     |                                                                                                                                                                                                                                                                                                                                       |                 |
| 43 |                                 |     |                                                                                                                                                                                                                                                                                                                                       |                 |
| 44 |                                 |     |                                                                                                                                                                                                                                                                                                                                       |                 |
| 45 |                                 |     |                                                                                                                                                                                                                                                                                                                                       |                 |
| 46 |                                 |     |                                                                                                                                                                                                                                                                                                                                       |                 |

|    |                               |     |                                                                                                                                                                                                                                                                                     |              |
|----|-------------------------------|-----|-------------------------------------------------------------------------------------------------------------------------------------------------------------------------------------------------------------------------------------------------------------------------------------|--------------|
| 1  | Consent or assent             | 26a | Who will obtain informed consent or assent from potential trial participants or authorised surrogates, and how (see Item 32)                                                                                                                                                        | _____7_____  |
| 2  |                               |     |                                                                                                                                                                                                                                                                                     |              |
| 3  |                               |     |                                                                                                                                                                                                                                                                                     |              |
| 4  |                               | 26b | Additional consent provisions for collection and use of participant data and biological specimens in ancillary studies, if applicable                                                                                                                                               | _____        |
| 5  |                               |     |                                                                                                                                                                                                                                                                                     |              |
| 6  |                               |     |                                                                                                                                                                                                                                                                                     |              |
| 7  | Confidentiality               | 27  | How personal information about potential and enrolled participants will be collected, shared, and maintained in order to protect confidentiality before, during, and after the trial                                                                                                | _____5_____  |
| 8  |                               |     |                                                                                                                                                                                                                                                                                     |              |
| 9  |                               |     |                                                                                                                                                                                                                                                                                     |              |
| 10 | Declaration of interests      | 28  | Financial and other competing interests for principal investigators for the overall trial and each study site                                                                                                                                                                       | _____15_____ |
| 11 |                               |     |                                                                                                                                                                                                                                                                                     |              |
| 12 |                               |     |                                                                                                                                                                                                                                                                                     |              |
| 13 | Access to data                | 29  | Statement of who will have access to the final trial dataset, and disclosure of contractual agreements that limit such access for investigators                                                                                                                                     | _____5_____  |
| 14 |                               |     |                                                                                                                                                                                                                                                                                     |              |
| 15 |                               |     |                                                                                                                                                                                                                                                                                     |              |
| 16 | Ancillary and post-trial care | 30  | Provisions, if any, for ancillary and post-trial care, and for compensation to those who suffer harm from trial participation                                                                                                                                                       | _____        |
| 17 |                               |     |                                                                                                                                                                                                                                                                                     |              |
| 18 |                               |     |                                                                                                                                                                                                                                                                                     |              |
| 19 |                               |     |                                                                                                                                                                                                                                                                                     |              |
| 20 | Dissemination policy          | 31a | Plans for investigators and sponsor to communicate trial results to participants, healthcare professionals, the public, and other relevant groups (eg, via publication, reporting in results databases, or other data sharing arrangements), including any publication restrictions | _____10_____ |
| 21 |                               |     |                                                                                                                                                                                                                                                                                     |              |
| 22 |                               |     |                                                                                                                                                                                                                                                                                     |              |
| 23 |                               |     |                                                                                                                                                                                                                                                                                     |              |
| 24 |                               | 31b | Authorship eligibility guidelines and any intended use of professional writers                                                                                                                                                                                                      | _____        |
| 25 |                               |     |                                                                                                                                                                                                                                                                                     |              |
| 26 |                               | 31c | Plans, if any, for granting public access to the full protocol, participant-level dataset, and statistical code                                                                                                                                                                     | _____        |
| 27 |                               |     |                                                                                                                                                                                                                                                                                     |              |
| 28 |                               |     |                                                                                                                                                                                                                                                                                     |              |
| 29 | <b>Appendices</b>             |     |                                                                                                                                                                                                                                                                                     |              |
| 30 |                               |     |                                                                                                                                                                                                                                                                                     |              |
| 31 | Informed consent materials    | 32  | Model consent form and other related documentation given to participants and authorised surrogates                                                                                                                                                                                  | _____        |
| 32 |                               |     |                                                                                                                                                                                                                                                                                     |              |
| 33 |                               |     |                                                                                                                                                                                                                                                                                     |              |
| 34 | Biological specimens          | 33  | Plans for collection, laboratory evaluation, and storage of biological specimens for genetic or molecular analysis in the current trial and for future use in ancillary studies, if applicable                                                                                      | _____        |
| 35 |                               |     |                                                                                                                                                                                                                                                                                     |              |
| 36 |                               |     |                                                                                                                                                                                                                                                                                     |              |

37 \*It is strongly recommended that this checklist be read in conjunction with the SPIRIT 2013 Explanation & Elaboration for important clarification on the items.  
 38 Amendments to the protocol should be tracked and dated. The SPIRIT checklist is copyrighted by the SPIRIT Group under the Creative Commons  
 39 "[Attribution-NonCommercial-NoDerivs 3.0 Unported](#)" license.  
 40
